# Supplementary material for: Ecological divergence and hybridization of Neotropical Leishmania parasites
Source: PubMed Central journal article supplement — Proc Natl Acad Sci U S A. 2020 Sep 21;117(40):25159–68. doi: 10.1073/pnas.1920136117 (PMC7547230; doi:10.1073/pnas.1920136117), 2020-09-21
Supplement: pnas.1920136117.sapp.pdf [file pnas.1920136117.sapp.pdf]

Supplementary Information for

## Ecological divergence and hybridization of Neotropical *Leishmania* parasites

Frederik Van den Broeck, Nicholas J. Savill, Hideo Imamura, Mandy Sanders, Ilse Maes, Sinclair Cooper, David Mateus, Marlene Jara, Vanessa Adai, Jorge Arevalo, Alejandro Llanos-Cuentas, Lineth Garcia, Elisa Cupolillo, Michael Miles, Matthew Berriman, Achim Schnauffer, James A. Cotton, Jean-Claude Dujardin

Frederik Van den Broeck: [fvandenbroeck@gmail.com](mailto:fvandenbroeck@gmail.com), 0032 3 247 67 94

Jean-Claude Dujardin: [jcdujardin@itg.be](mailto:jcdujardin@itg.be), 0032 3 247 63 58

### This PDF file includes:

|                                                                                   |    |
|-----------------------------------------------------------------------------------|----|
| Supplementary Information Text.....                                               | 2  |
| Supplementary Methods. Automated assembly and circularization of minicircles..... | 2  |
| Supplementary Results A. Minicircle sequence complexity.....                      | 2  |
| Supplementary Results B: Prediction of mitochondrial guide RNA genes.....         | 3  |
| Supplementary Figures S1-S17.....                                                 | 4  |
| Supplementary Tables S1-S8.....                                                   | 16 |
| SI References.....                                                                | 28 |

## SUPPLEMENTARY INFORMATION TEXT

### Supplementary Methods. Automated assembly and circularization of minicircles

We implemented a novel bioinformatics pipeline in python to automate the assembly and circularization of minicircle sequences from short-read whole genome sequence data. An overview of the pipeline named KOMICS (Kinetoplast genOMICS) is given in *SI Appendix*, Fig. S12, and the program is available at <https://frebio.github.io/komics>.

KOMICS takes as input paired-end reads in BAM format, whereby reads were aligned to a nuclear reference genome. Reads that did not align to the nuclear genome are extracted from the alignment file. In order to minimize bias in the assembly process due to sequencing errors, reads are quality trimmed using TRIMMOMATIC v0.32 (1) with the following settings: bases with a quality below 30 are cut from both ends of the read (LEADING:30 TRAILING:30), reads are cut once the average quality within a 10bp window drops below 30 (SLIDINGWINDOW:10:30), reads below 100bp in length are dropped (MINLEN:100) and Illumina adapters were removed (ILLUMINACLIP:TruSeq3-PE.fa:2:30:15:1). High quality reads are then used for *de novo* assembly using a multiple *k*-mer strategy in MEGAHIT (2), currently the most efficient assembler optimized for large and complex metagenomics sequencing data. As MEGAHIT deals with non-uniform sequencing depths (2), it is suitable for assembling minicircle sequences that show a large variability in copy numbers.

The resulting contigs of the MEGAHIT assembly are filtered for the presence of the Conserved Sequence Block 3 (CSB3), a 12-bp minicircle motif, also known as the universal minicircle sequence, that is highly conserved across all Kinetoplastida species (3). By default, KOMICS uses the known CSB-3 motif GGGGTTGGTGTA and its reverse complement to extract contigs of putative minicircle origin. For circularization, komics uses BLAST (4) as a strategy to identify a sequence that is in common at the start and the end of a given minicircle contig. MEGABLAST is run on the entire set of minicircle contigs with the low complexity filter turned off and allowing a maximum e-value of  $10^{-5}$ . The BLAST output is processed to retain only hits among the same minicircle contig (avoiding artificial dimers) with 100% identity and a minimum 20bp overlap at the start and end of a given contig. Whenever an overlap is found, the contig is classified as circular and the duplicated sequence at the start of the contig is removed. Finally, the assembly is polished by putting the CSB3-mer at the start.

The quality of the minicircle assembly is verified by aligning the unmapped reads to all minicircles using SMALT, whereby the circular minicircles were extended by 150bp, and estimating the following mapping metrics. First, the quality of the total assembly for a given sample is verified by estimating the number of reads that are (i) mapped, (ii) perfectly matched, (iii) properly paired (including reads that align at both ends in opposite direction) or (iv) aligned with a minimum mapping quality of 20. The same numbers are also estimated but only for those reads that contain the CSB3-mer, allowing to estimate the proportion of successfully assembled minicircles for a given sample. Second, the quality of each minicircle assembly is verified by estimating the same metrics as listed above for the total assembly, and by estimating the mean, median, minimum and maximum read depth.

### Supplementary Results A. Minicircle sequence complexity

Minicircles were assembled and circularized for each of the 67 isolates using the Python package KOMICS (see above and *SI Appendix*, Fig. S12). A total of 9,003 minicircle contigs were assembled for 64 isolates, of which 6,949 (77%) circularized. The assembly process failed for 3 isolates (LC1565, LC1409, LC1412) for which there were insufficient mitochondrial reads. The number of assembled minicircle contigs per isolate did not depend on sequencing depth, as there was no association between median genome-wide read depth and the number of minicircles in *L. braziliensis* ( $r = 0.20$ ,  $p = 0.41$ ), *L. peruviana* ( $r = 0.07$ ,  $p = 0.7$ ) and the hybrids ( $r = 0.03$ ,  $p = 0.92$ ). To validate the quality of the assembly, reads were aligned to the minicircle contigs and several mapping statistics were summarized. First, on average 95% of all mapped reads were properly paired and 93% aligned with a mapping quality larger than 20 (*SI Appendix*, Table S5). Second, a total of 100 homozygous SNPs were identified within 56 contigs, which is only 0.62% of all contigs, suggesting a robust assembly for the large majority of the minicircle contigs. Third, the length of the majority of the circularized minicircles (6,906 contigs, 99.3%) showed a bimodal distribution around ~740 bp and ~750 bp (*SI Appendix*, Fig. S13), which is comparable to the minicircle length (~850 bp) found in *L. tarentolae* (5). The remaining 43 contigs (<0.7%) showed twice this length (~1490 bp), suggesting that these may be artificial minicircle dimers. Finally, the number of reads containing the Conserved Sequence Block 3 (CSB-3) 12-mer (also called universal minicircle sequence (3)) was calculated as a proxy for the total number of minicircles initially present within the DNA sample. Note that the CSB-3 12-mer is present within both the minicircles (3) and maxicircles (6), but here we only used reads that did not align to the maxicircle. On average, 95%

of all CSB3-containing reads aligned against a given minicircle contig, 90% aligned with a perfect match and 89% aligned in proper pairs (*SI Appendix*, Table S5), suggesting that KOMICS was able to retrieve the large majority of the minicircles.

Minicircle complexity and ancestry was studied using a clustering approach to find sets of minicircle sequences that show a minimum percent identity with each other (here-after referred to as minicircle sequence classes or MSCs). These clustering analyses were only done on the circularized minicircle contigs of the expected length, as these would produce the most robust alignments. The combined number of MSCs from all isolates decreased sharply from 4,290 MSCs at 100% identity to only 582 MSCs at 95% identity and 311 MSCs at 80% identity (*SI Appendix*, Fig. S14a). As percent identity decreased, the alignments were more prone to gaps larger than or equal to 2 nucleotides (*SI Appendix*, Fig. S14b). Specifically, there was a sharp increase in the number of alignments with 3-nt gaps from 97% to 96% identity (*SI Appendix*, Fig. S14b), suggesting that clustering results may be less robust below the 97% identity threshold. In addition, discriminatory power decreased strongly below the 97% identity threshold as we observed a decrease in the proportion of MSCs unique to *L. peruviana* and an increase in the proportion of MSCs shared between *L. braziliensis*, *L. peruviana* and the hybrids (*SI Appendix*, Fig. S15a). Focusing on the results at 97% identity, a significantly lower number of MSCs were found per isolate in *L. peruviana* (mean = 81 MSCs/isolate) compared to *L. braziliensis* (mean = 147 MSCs/isolate;  $p < 0.0001$ ), with hybrids showing an intermediate value (mean = 111 MSCs/isolate) (*SI Appendix*, Fig. S15b). To study the ancestry of *Leishmania* based on minicircle complexity, we reconstructed a Euclidean distance matrix based on MSCs observed in each *Leishmania* isolate at the 97% identity threshold. A Neighbor-Joining phylogenetic tree including *L. panamensis* revealed a remarkably similar topology as seen using genome-wide SNPs (Fig. 1a), with a clear distinction between the *L. peruviana* Porculla lineage and the *L. peruviana* Surco lineages (*SI Appendix*, Fig. S15c).

### Supplementary Results B: Prediction of mitochondrial guide RNA genes

Putative guide RNA genes (gRNA's) were identified by aligning minicircle and maxicircle sequences to predicted edited mRNA sequences, allowing for G-U base-pairs (7) (see Methods). This was done for four isolates representing *L. braziliensis*, *L. peruviana* Porculla, *L. peruviana* SUCS and a hybrid *L. braziliensis* x *L. peruviana* parasite.

All annotated minicircles contained the expected three Conserved Sequence Blocks and 65%-81% (depending on the isolate) had a single predicted gRNA of at least 40 bp complementarity to edited mRNA sequence ~500 bp downstream of the CSB-3 sequence (*SI Appendix*, Fig. S16, blue dots). Shorter complementary sequences were found throughout the minicircle sequences (*SI Appendix*, Fig. S16, orange and green dots), suggesting that these were non-specific matches. 19%-35% of the minicircles did not contain a gRNA gene based on our filtering criteria (*SI Appendix*, Table S6). A total of 19-21 gRNAs were identified within the maxicircle of *L. peruviana* and *L. braziliensis* (*SI Appendix*, Table S7), a number that far exceeded the seven maxicircle-encoded gRNAs (Ma-gRNAs) reported for *L. tarentolae* (5) and *Crithidia fasciculata* (8). Five of the Ma-gRNAs identified are shared among all four species, covering editing sites in the 5'-edited maxicircle genes ND7, CYb, A6 and MURF2 (*SI Appendix*, Table S7; orange bars). The remaining 14-16 Ma-gRNAs identified in *L. braziliensis* and *L. peruviana* were novel and non-redundant candidates, covering editing sites in the pan-edited maxicircle genes ND8, ND9, GR3 and GR4 (*SI Appendix*, Table S7).

A total of 123 gRNAs were identified in *L. peruviana* Surco, 151 gRNAs in *L. peruviana* Porculla, 154 gRNAs in *L. braziliensis* and 157 gRNAs in hybrid *L. peruviana* x *L. braziliensis* (*SI Appendix*, Table S6). Paired t-tests showed that there was a significantly lower number of gRNAs between *L. peruviana* Surco on the one hand and *L. peruviana* Porculla ( $p = 0.038$ ), *L. braziliensis* ( $p = 0.049$ ) and the hybrid ( $p = 0.018$ ) on the other hand. The lower number of predicted gRNAs in *L. peruviana* Surco resulted in a lower proportion of editing sites covered by a gRNA (92.52%) when compared to *L. peruviana* Porculla (97.13%), *L. braziliensis* (98.17%) and the *L. peruviana* x *L. braziliensis* hybrid (97.37%) (*SI Appendix*, Table S6).

The distribution and ancestry of the predicted gRNAs was examined across the three pan-edited genes GR4, ND8 and ND9, revealing two major results (*SI Appendix*, Fig. S17). First, many of the novel Ma-gRNAs covered editing sites that were not covered by minicircle-encoded candidates (*SI Appendix*, Fig. S17, black stars), suggesting that these Ma-gRNAs may be essential to prevent a break of the 3'-5' editing cascade. This is most clearly observed for the *L. peruviana* SUCS isolate where Ma-gRNAs covered four different locations in the ND9 gene that were not covered by minicircle-encoded gRNAs

(SI Appendix, Fig. S17, black stars). Second, *L. peruviana* x *L. braziliensis* hybrids showed a mosaic ancestry of gRNAs originating from both parental species, with *L. peruviana* - specific gRNAs aligning in locations where there were no *L. braziliensis* - specific gRNAs (SI Appendix, Fig. S17, blue stars). This result shows that, in addition to mixed ancestry of gRNAs, complete editing in hybrid kinetoplasts may be dependent on gRNAs from both parents.

## SUPPLEMENTARY FIGURES

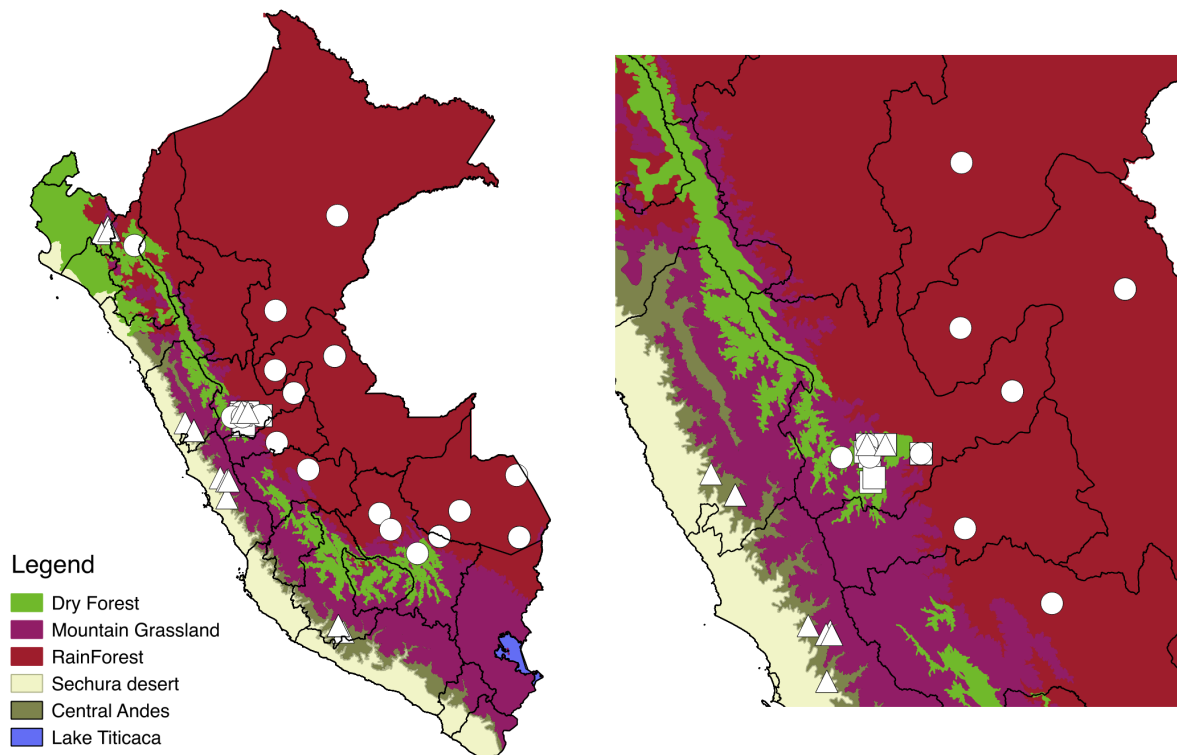

**Fig. S1. Map of Peru.**

Map of Peru depicting the main biogeographic regions (see legend), the administrative regions (black lines) and the distribution of isolates of *L. peruviana* (triangles), *L. braziliensis* (circles) and their hybrids (squares). Note that symbols overlap and the size of the symbols does not reflect the number of isolates sampled at a given geographical location. Map on the right focuses on the Huánuco region where *L. braziliensis*, *L. peruviana* and their hybrids occur sympatrically.

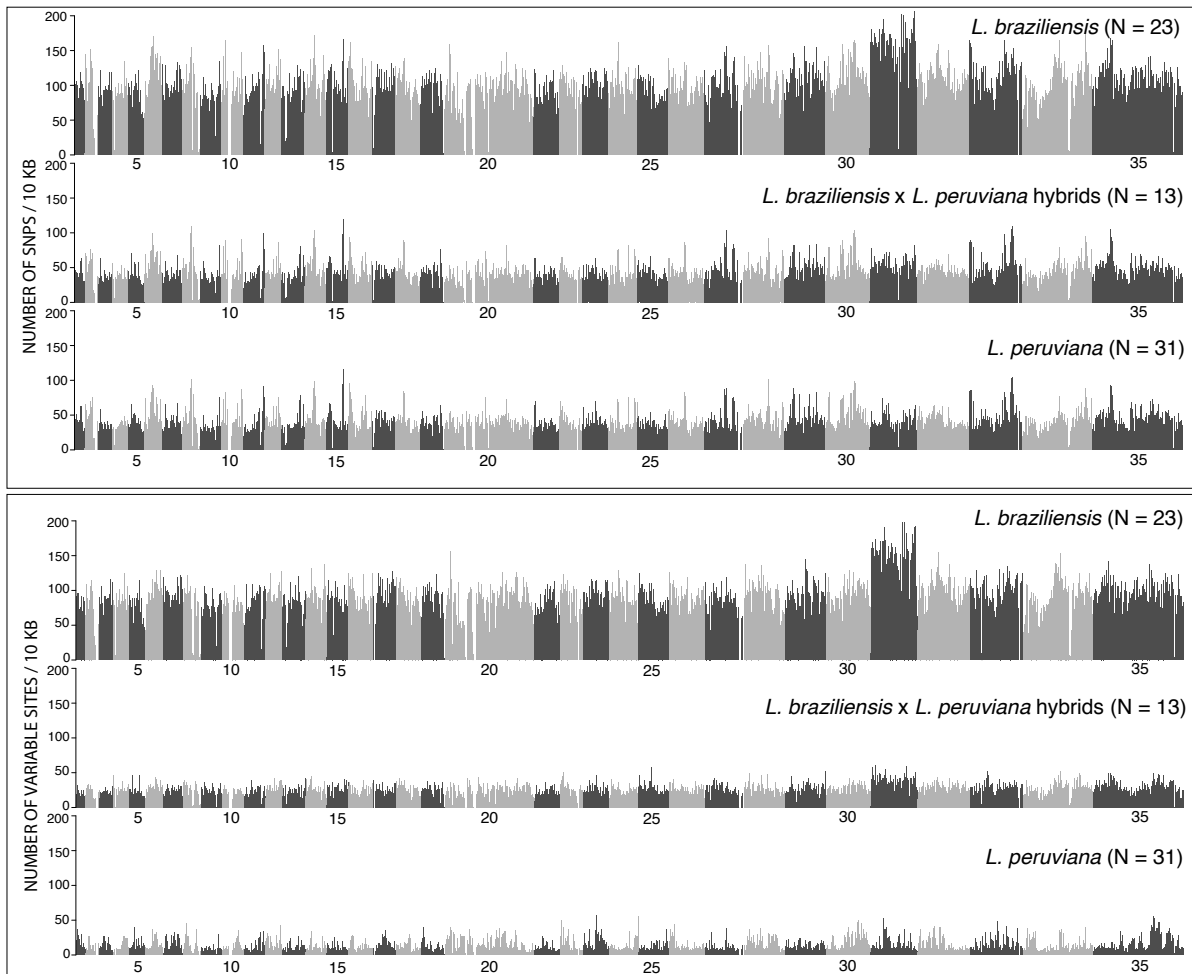

**Fig. S2. Genome-wide SNP distribution.**

Number of SNPs (top panel) and variable sites (bottom panel) were estimated within 10kb genomic windows for 23 *L. braziliensis*, 31 *L. peruviana* and 13 hybrid isolates. Genome-wide median numbers are shown on the right of each barplot. Numbers below barplots reflect chromosome numbers (35 chromosomes in total), with alternating light and dark grey barplots coinciding with each chromosome.

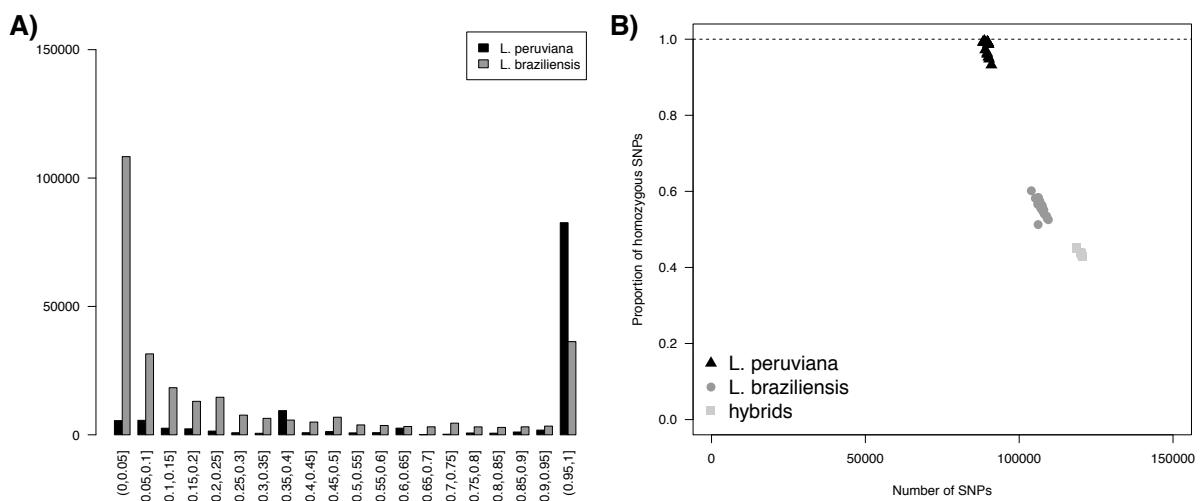

**Fig. S3. Allele frequency distribution.**

(a) Alternate (non-reference) allele frequency distribution for *L. braziliensis* and *L. peruviana*. (b) Proportion of homozygous SNPs versus the number of SNPs per *L. peruviana*, *L. braziliensis* or hybrid genome.

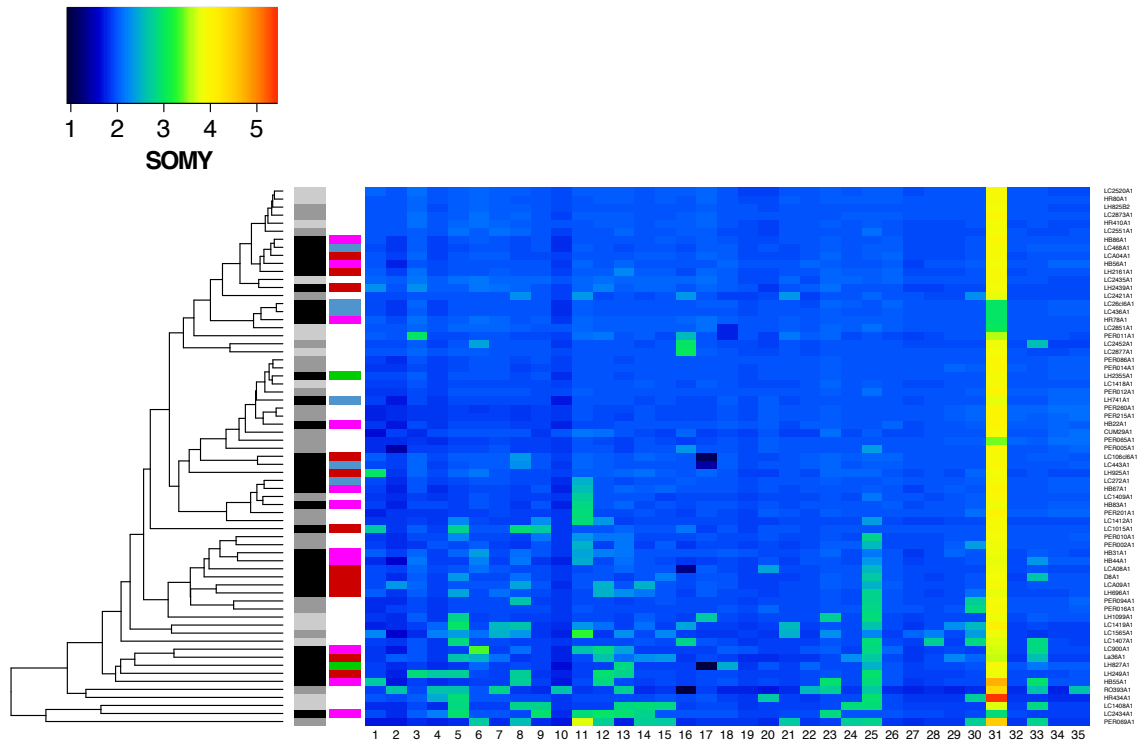

**Fig. S4. Somy variability.**

Somy variability within the *L. braziliensis* species complex for each of the 35 major chromosomes. Dendrogram on the left clusters parasites with similar somy estimates, with aneuploid parasites appearing at the bottom of the heatmap and diploid parasites at the top of the heatmap (with exception of the tetrasomic chromosome 31). Grayscale boxes at the tips of the dendrogram represent *L. peruviana* (black), *L. braziliensis* (dark grey) and their hybrids (light grey). The coloured boxes at the tips of the dendrogram represent the different *L. peruviana* subpopulations (*SI Appendix*, Fig. S6).

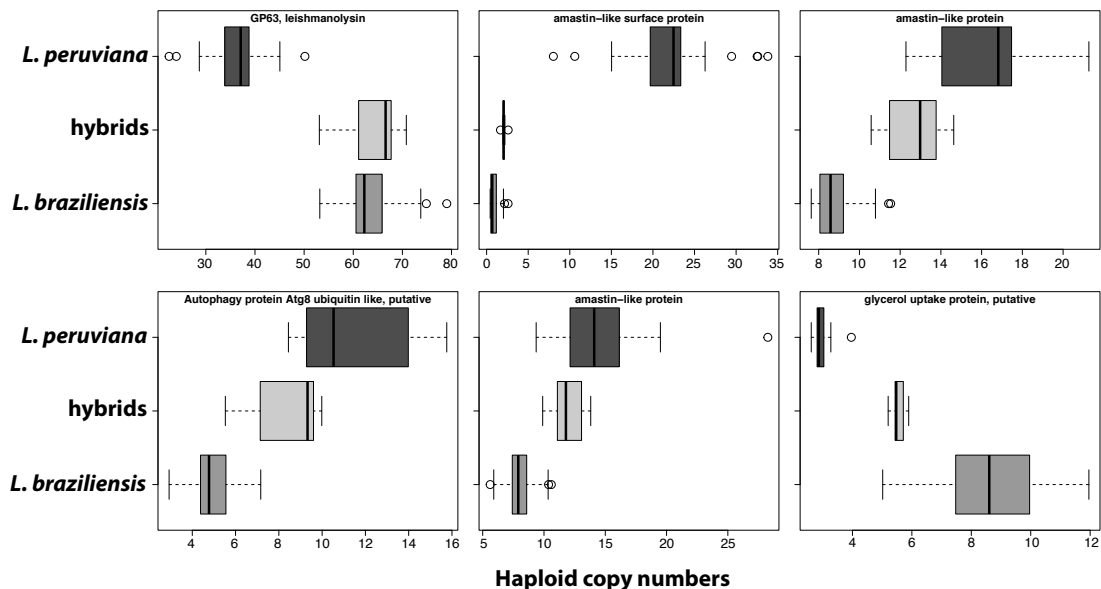

**Fig. S5. Major structural variations.**

Boxplots summarize the haploid copy numbers of orthologous gene groups that were found to be most significantly different between *L. peruviana* and *L. braziliensis*.



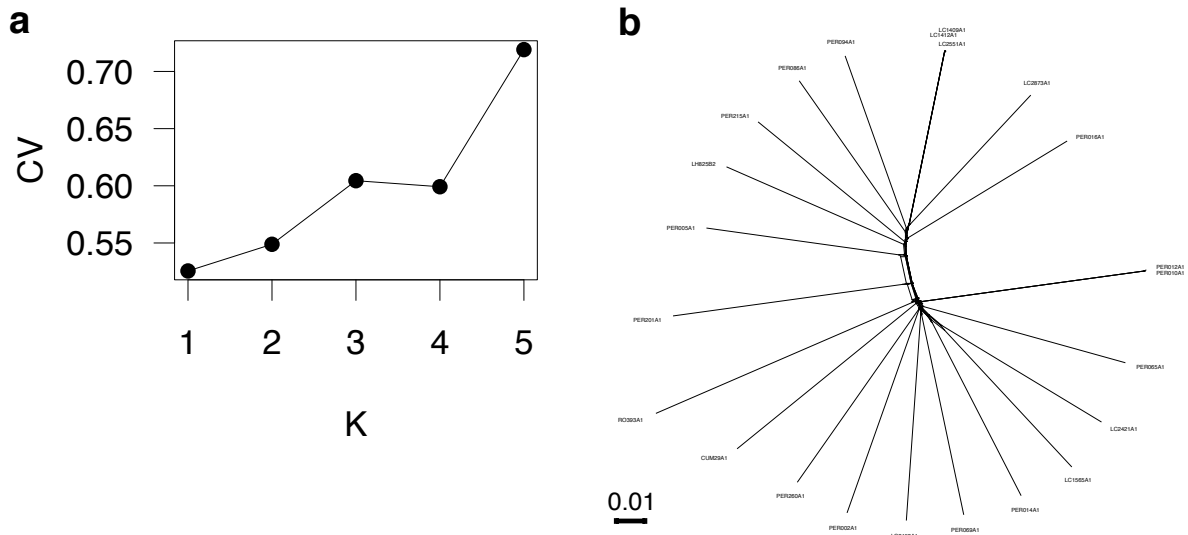

**Fig. S7. Population genomic structure of *L. braziliensis*.** Analyses of population structure for *L. braziliensis* based on 342,884 genome-wide bi-allelic SNPs. **(a)** Results from ADMIXTURE. Line plot shows the cross-validation error (CV) for  $K = 1$  to  $K = 5$ . **(b)** Phylogenetic network analyses based on uncorrected  $p$ -distances.

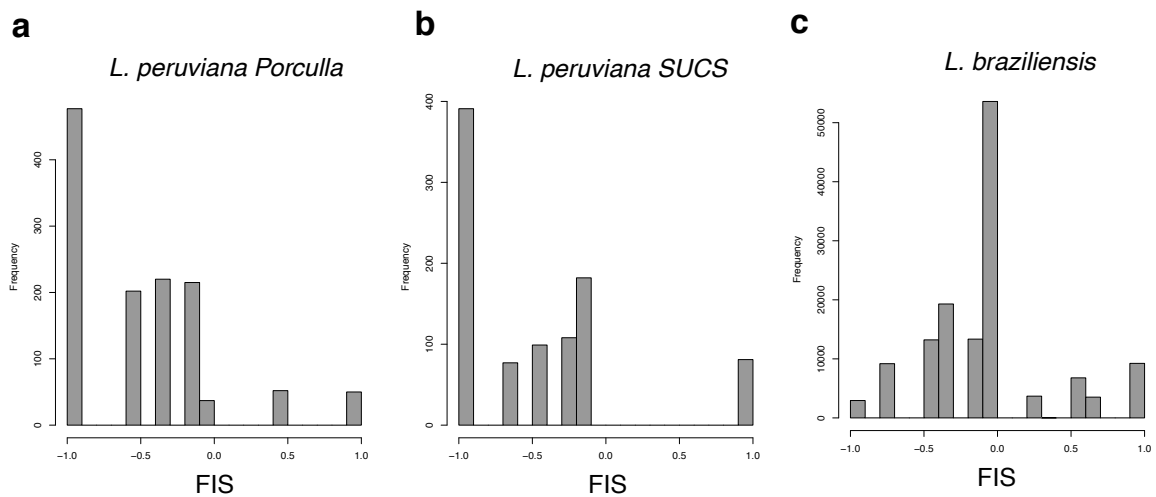

**Fig. S8. Hardy-Weinberg Equilibrium estimates.** Distribution of  $F_{IS}$  as estimated per locus for each of the three major *Leishmania* populations.



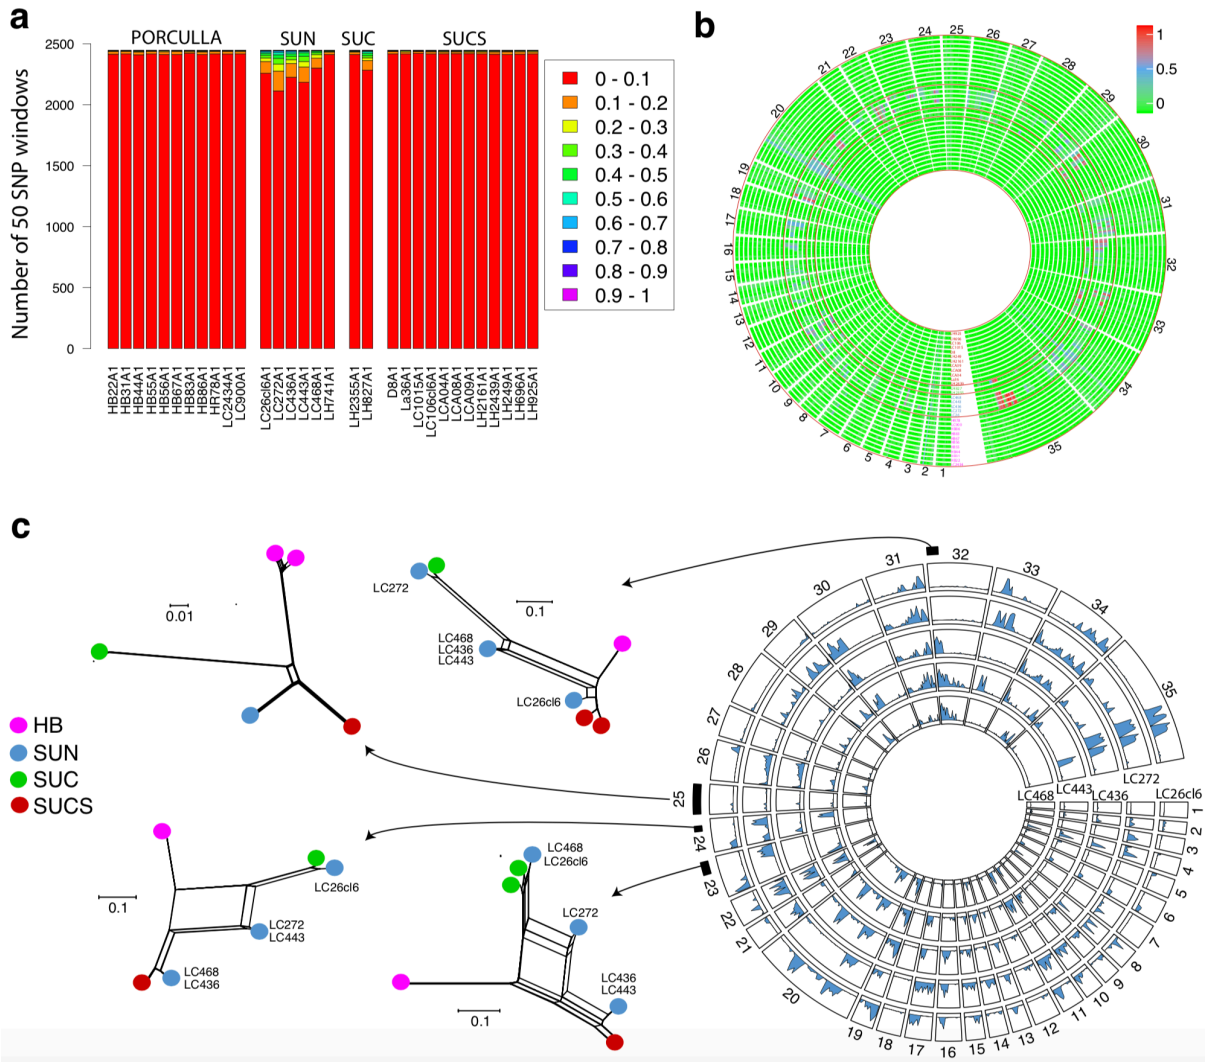

**Fig. S9. Signatures of historical hybridization in *L. peruviana*.**

(a-b) Proportion of heterozygous sites in 50 SNP windows for each *L. peruviana* genome revealed that all SUN isolates and SUC isolate LH827 contained genomic windows with elevated proportions of heterozygous sites compared to the other *L. peruviana* isolates. (c) Phylogenetic networks of SNPs in several such heterozygous regions revealed that these isolates were of mixed ancestry. For instance, isolate LC272 contained elevated proportions of heterozygous sites in chromosome 23, and this isolate clustered between the SUC and the SUCS groups. In the same genomic region, SUN isolates LC436 and LC443 were largely homozygous and clustered entirely with the SUCS population, suggesting introgressive hybridization between SUCS and SUN. Similar patterns are shown for chromosome 24 and 32. For chromosome 25 that was largely homozygous in all isolates, network analyses showed a similar population structure as observed based on genome-wide SNPs (*SI Appendix*, Fig. S6, S7b).

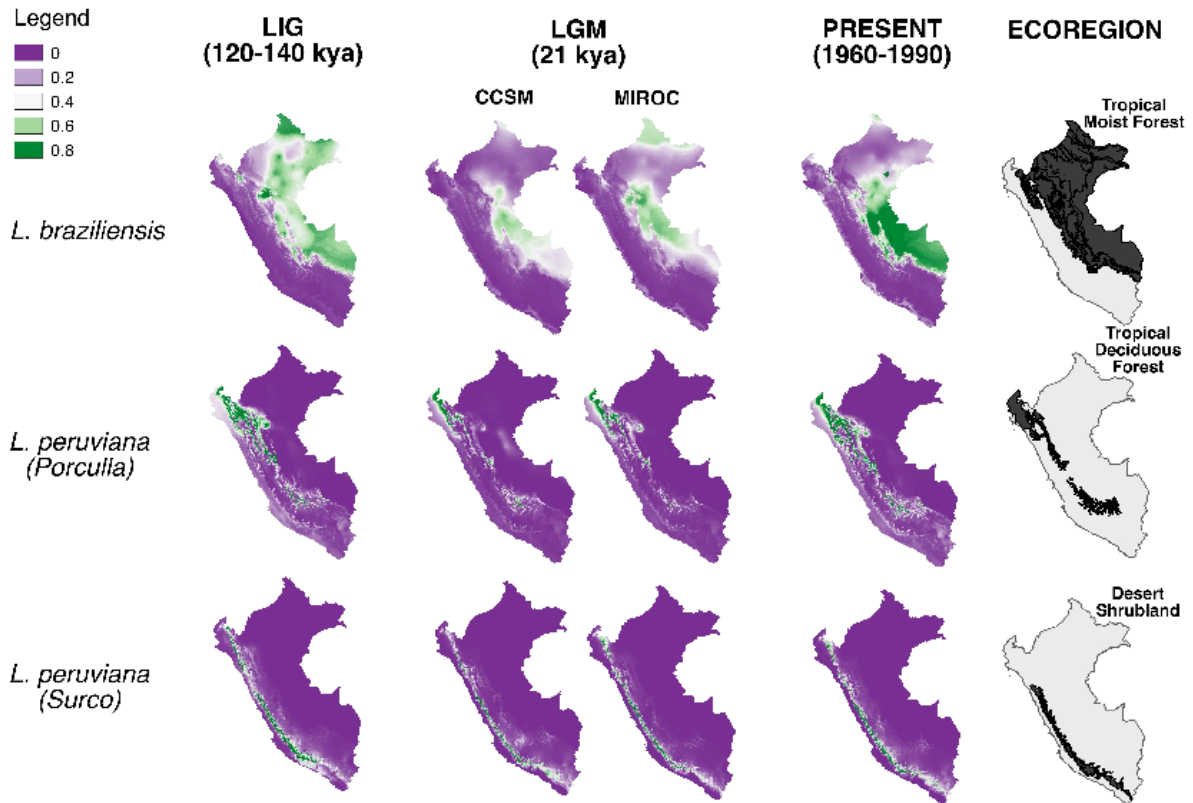

**Fig. S10. Ecological Niche Modeling.**

Tests for range expansion, contraction or shift using ecological niche modeling. Geographic maps of Peru depicting the distribution probability for each of the three major *Leishmania* groups for the present, the last interglacial (LIG) and the last glacial maximum (LGM) under different climate models: the Community Climate System Model(9) (CCSM) and the Model for Interdisciplinary Research on Climate(10) (MIROC).

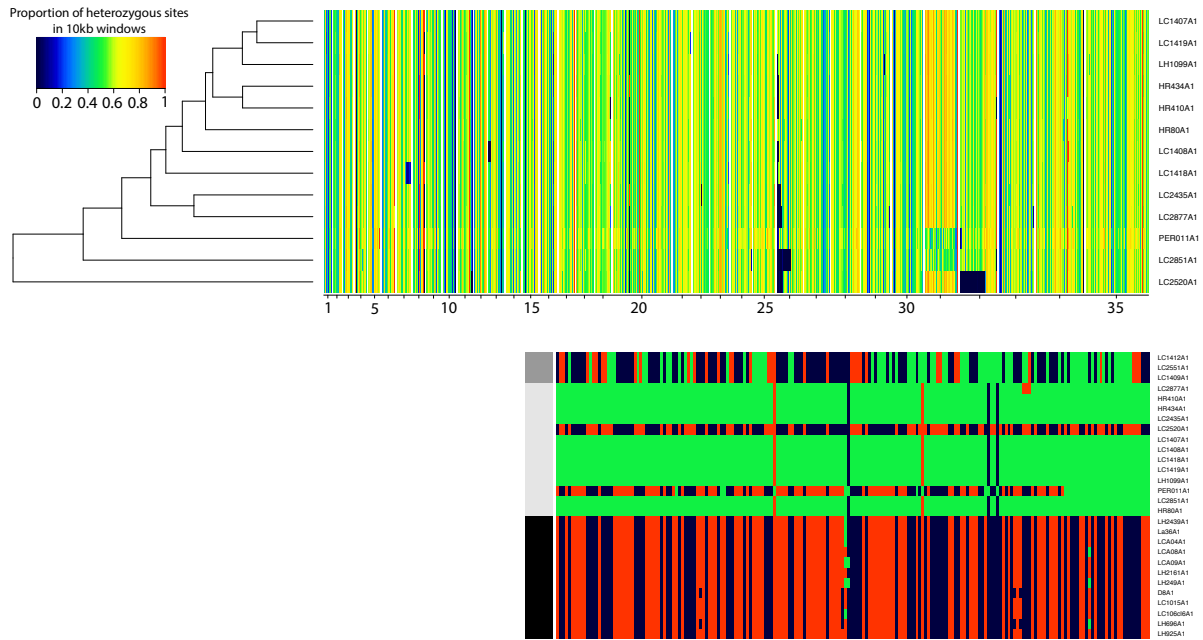

**Fig. S11. Genome-wide heterozygosity in hybrid parasites.**

Heatmap on top shows the proportion of heterozygous sites in 10kb windows across the 35 major chromosomes (x-axis) for the 13 hybrid *L. peruviana* x *L. braziliensis* isolates. Heatmap below shows the allelic profiles of the first 86.5kb of chromosome 32 in the 13 hybrid isolates (light grey boxes), their putative *L. peruviana* parent group (black boxes) and their putative *L. braziliensis* parent group (dark grey boxes). For each SNP identified within this stretch, alleles were coloured dark blue if homozygous for the reference allele, dark red if homozygous for the alternate allele and green if heterozygous. Notice the two homozygous stretches in isolate LC2520 (homozygous for the *L. braziliensis* alternate alleles) and PER011 (homozygous *L. peruviana* alternate alleles).

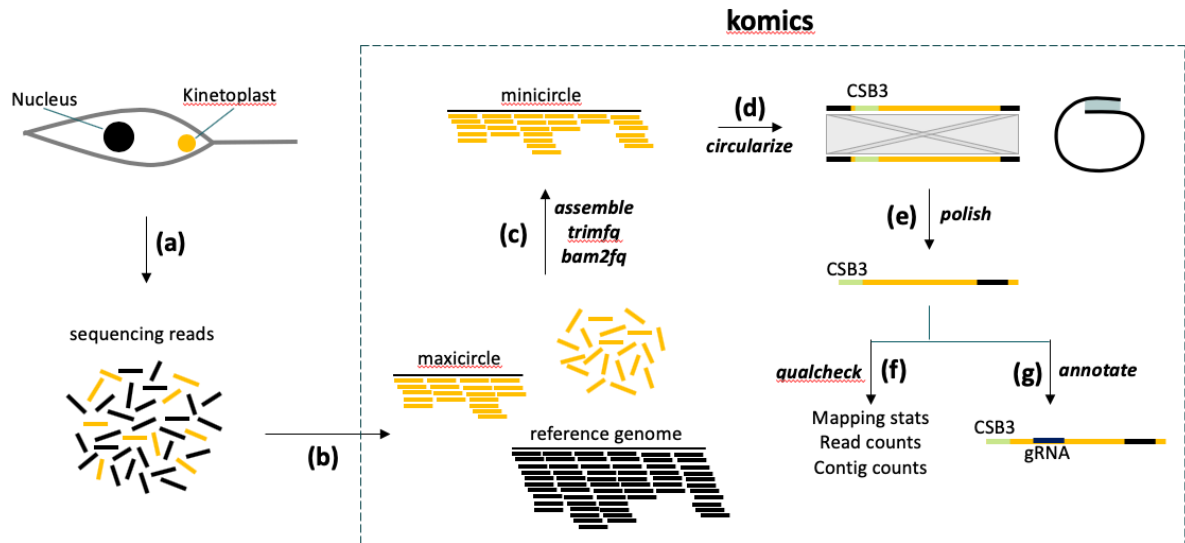

**Fig. S12. The KOMICS pipeline.**

The KOMICS pipeline as implemented in a python package, showing the different modules at each step (see text for details). (a) Whole cellular DNA extractions are used for paired-end whole-genome sequencing with Illumina. (b) The reads are aligned to the reference genome containing the 35 major chromosomes and a complete maxicircle sequence. (c) Unaligned reads are extracted from the BAM files, quality trimmed and used for *de novo* assembly. (d) Contigs containing the CSB3 reads are extracted and circularized using a BLAST approach. (e) Circularized minicircle sequences were further polished by putting the CSB3-mer at the start of the minicircle sequence. (f) Unaligned reads from step (b) are mapped to the final sets of minicircles to calculate mapping statistics. (g) Guide RNA genes are predicted by aligning minicircles to edited maxicircle sequences (this step is not implemented in KOMICS).

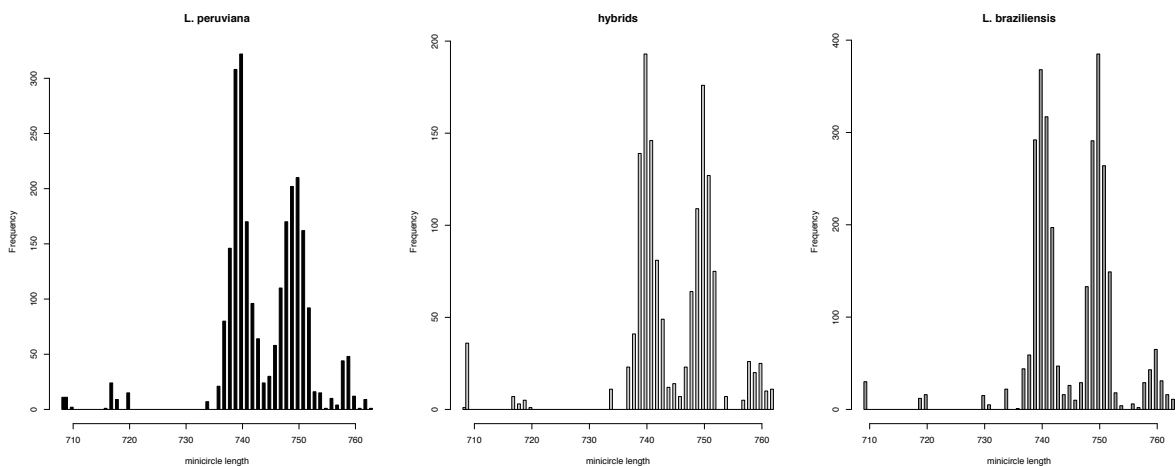

**Fig. S13. Minicircle length distribution for each species and their hybrids.**

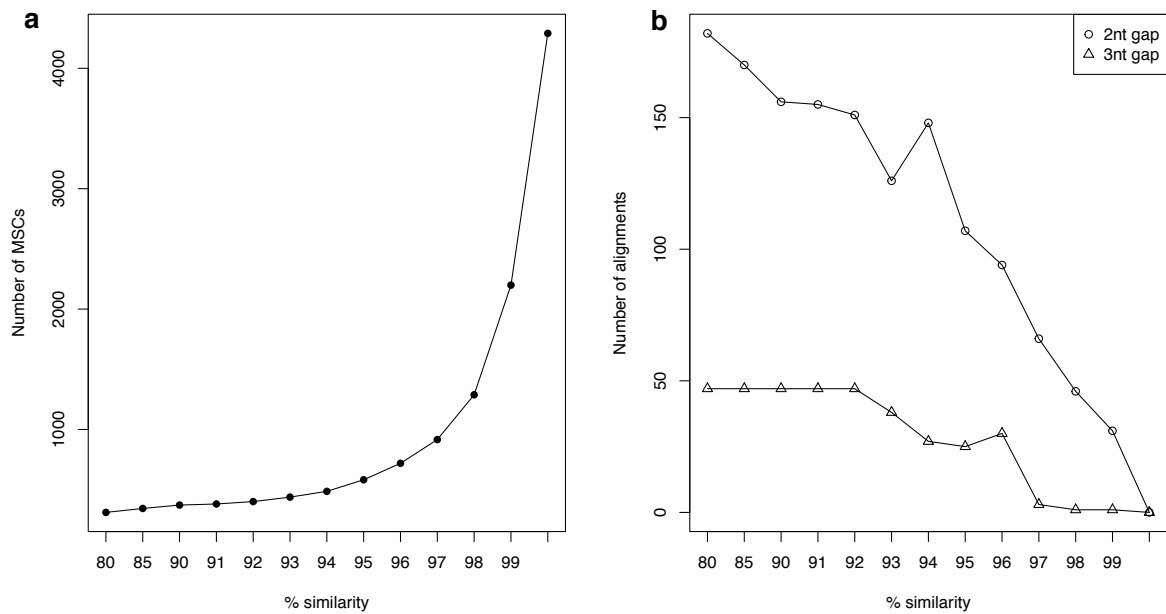

**Fig. S14. Minicircle clustering results.**

(a) Results of clustering analyses whereby minicircle sequences were grouped into minicircle sequence classes (MSC) (y-axis) based on percent similarity (x-axis). (b) Number of alignments with a 2nt and 3nt gap during the clustering analyses.

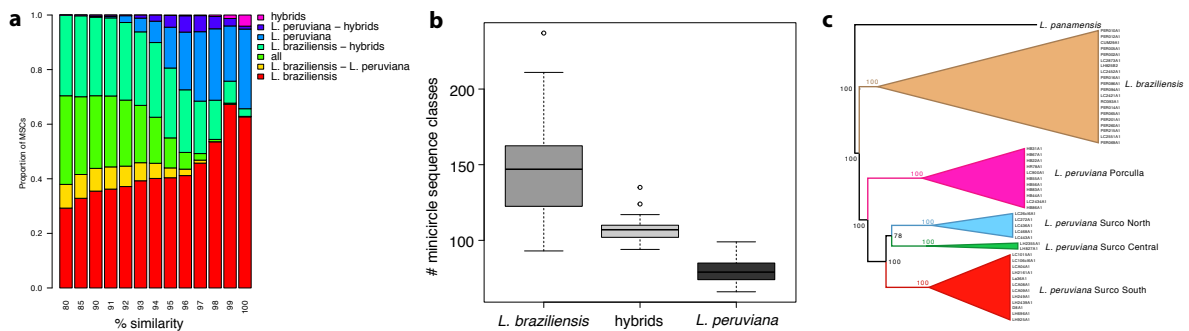

**Fig. S15. Minicircle complexity and ancestry.**

(a) Barplots show the proportion of minicircle sequence classes that are unique or shared between *L. braziliensis*, *L. peruviana* and their hybrids, for each % identity threshold used during the clustering analyses. (b) Boxplot showing the number of minicircle sequence classes within *L. peruviana*, *L. braziliensis* and their hybrids (c) Neighbor-Joining tree based on a Euclidean distance matrix as estimated based minicircle sequence classes observed in each *Leishmania* isolate.

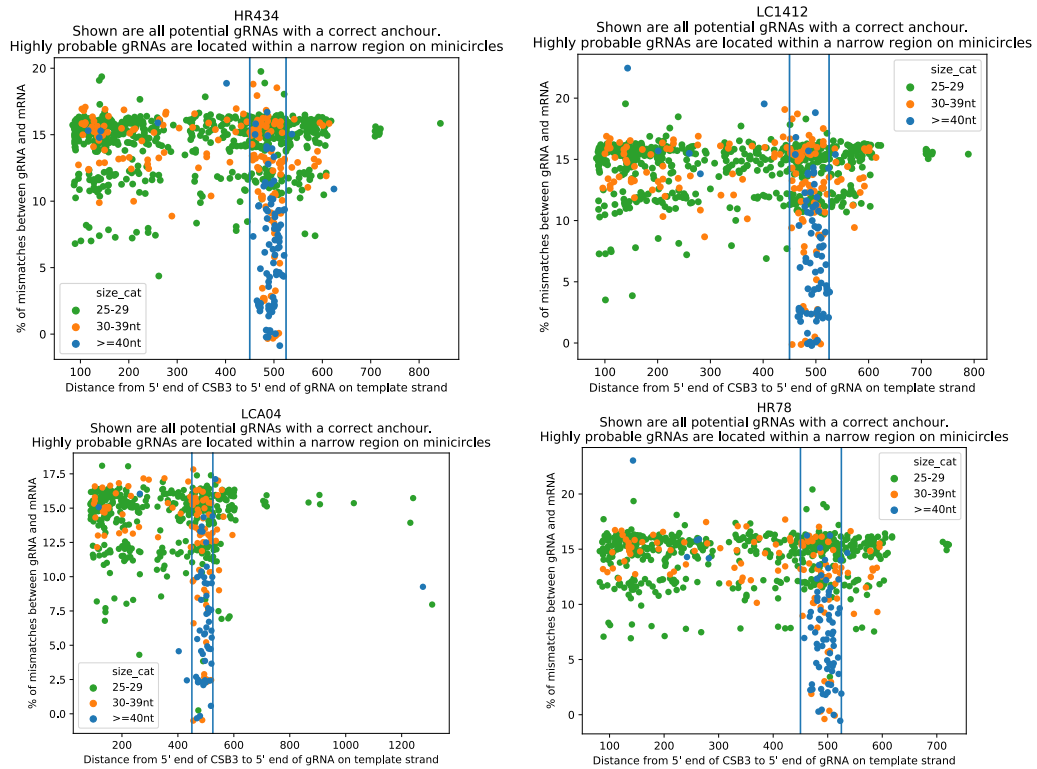

**Fig. S16. Positions of predicted gRNA genes in minicircles.**

Positions of predicted gRNA's relative to the CSB3 fragment on each minicircle. Only gRNA's within 500bp from the CSB3 are kept for further analyses.

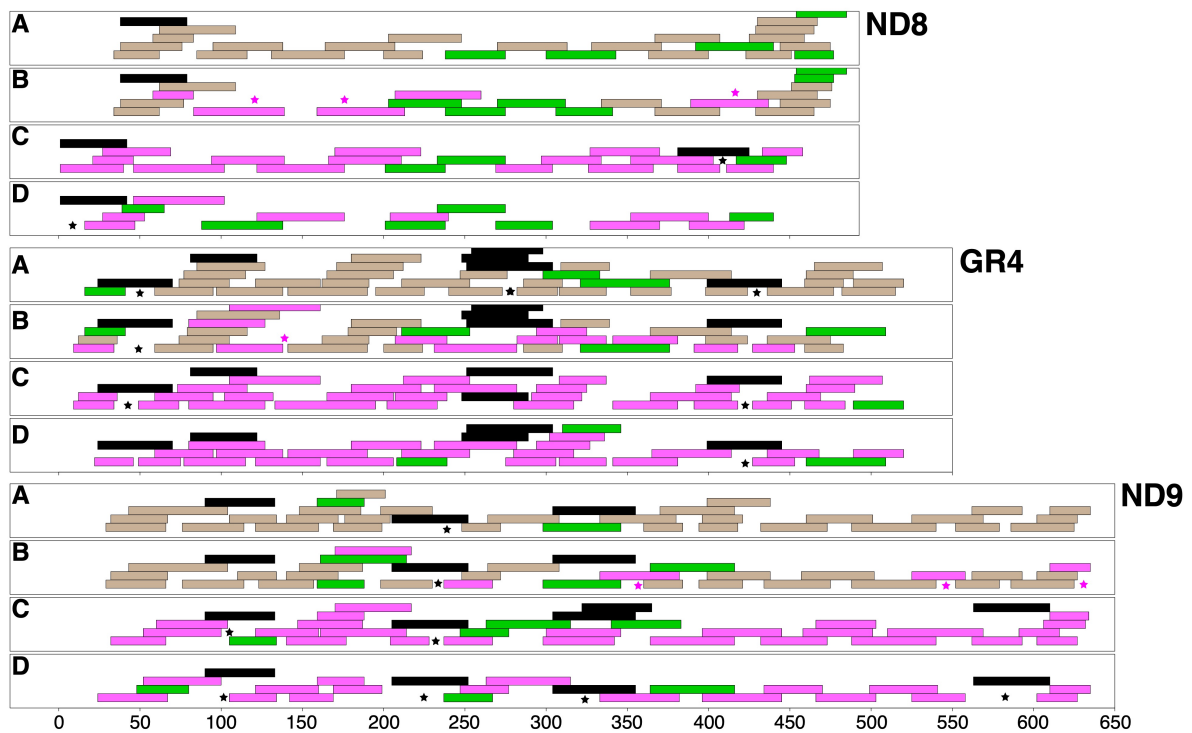

**Fig. S17. Coverage of editing sites for the extensively edited maxicircle genes ND8, GR4 and ND9.**

Stacked rectangles are gRNA genes covering editing sites in a given maxicircle gene of *L. braziliensis* isolate LC1412 (A), hybrid isolate HR434 (B), *L. peruviana* Porculla isolate HR78 (C) and *L. peruviana* SUCS isolate (D). Colors indicate whether the gRNA originated from the maxicircle (black) or from a minicircle found in *L. braziliensis* (brown), *L. peruviana* (magenta) or both (green). Black stars indicate editing sites that are covered solely by maxicircle-encoded gRNA candidates. Magenta stars in hybrid isolate HR434 (B) indicate editing sites solely covered by *L. peruviana* gRNA candidates.

Please note that there are gaps in the sequence coverage for which no gRNA is given. There are three possible explanations for these gaps:

1. The missing gRNAs are encoded by minicircles that we didn't assemble. Please note that based on the Conserved Sequence Block 3 (CSB-3) we estimated that we retrieved between 89% to 95% of all minicircles per kinetoplast network (SI Appendix, Supplementary Results A). While this number is very high, it also shows that we probably missed some minicircles.
2. Our algorithm for predicting gRNAs is not perfect because the rules that define a functional gRNA (e.g. length of the overall match, anchor length, number of gaps and mismatches tolerated in the alignment) are not known. So, we cannot exclude that we have missed some gRNAs in our annotation pipeline.
3. The fully edited sequences that we used are based on the literature but could be slightly different in these isolates. In that case some of the gRNAs might be missed.

## SUPPLEMENTARY TABLES

**Table S1. List of 68 isolates used for whole-genome sequencing.**

Note that - for the purposes of minicircle sequence analyses - four isolates were re-sequenced after a phenol/chloroform DNA extraction, resulting in a total of 72 whole genomes. For anonymity reasons, details on sampling locations were omitted from the table, but are available upon request.

The World Health Organization (WHO) code is as follows: host (M for Mammalia, HOM = Homo sapiens & CAN = Canis familiaris; I for Insecta; AYA = *Lutzomyia ayacuchensis*)/country(BO = Bolivia; PE = Peru)/year of isolation/name of strain.

| WHO code                  | Sample Code | Species                | Year of isolation | Country  | Region         | DNA extraction    |
|---------------------------|-------------|------------------------|-------------------|----------|----------------|-------------------|
| MHOM/PE/02/LH2210(PER010) | PER010A1    | <i>L. braziliensis</i> | 2002              | Peru     | Cajamarca      | commercial kit    |
| MHOM/PE/91/LC1565         | LC1565A1    | <i>L. braziliensis</i> | 1991              | Peru     | Cusco          | commercial kit    |
| MHOM/PE/01/LH2217(PER012) | PER012A1    | <i>L. braziliensis</i> | 2001              | Peru     | Cusco          | commercial kit    |
| MHOM/PE/02/LH2287(PER065) | PER065A1    | <i>L. braziliensis</i> | 2002              | Peru     | Cusco          | commercial kit    |
| MHOM/PE/91/LC1409         | LC1409A1    | <i>L. braziliensis</i> | 1991              | Peru     | Huánuco        | commercial kit    |
| MHOM/PE/91/LC1412         | LC1412A1    | <i>L. braziliensis</i> | 1991              | Peru     | Huánuco        | commercial kit    |
| MCAN/PE/94/LC2412         | LC2421A1    | <i>L. braziliensis</i> | 1994              | Peru     | Huánuco        | commercial kit    |
| MHOM/PE/94/LC2452         | LC2452A1    | <i>L. braziliensis</i> | 1994              | Peru     | Huánuco        | commercial kit    |
| MHOM/PE/94/LC2551         | LC2551A1    | <i>L. braziliensis</i> | 1994              | Peru     | Huánuco        | commercial kit    |
| MHOM/PE/95/LC2873         | LC2873A1    | <i>L. braziliensis</i> | 1995              | Peru     | Huánuco        | commercial kit    |
| MHOM/PE/02/LH2224(PER016) | PER016A1    | <i>L. braziliensis</i> | 2002              | Peru     | Huánuco        | commercial kit    |
| MHOM/PE/02/LH2356(PER094) | PER094A1    | <i>L. braziliensis</i> | 2002              | Peru     | Huánuco        | commercial kit    |
| MHOM/PE/01/LH2033(PER014) | PER014A1    | <i>L. braziliensis</i> | 2001              | Peru     | Junín          | commercial kit    |
| MHOM/PE/01/LH2182(PER005) | PER005A1    | <i>L. braziliensis</i> | 2001              | Peru     | Loreto         | commercial kit    |
| MHOM/PE/03/PER201         | PER201A1    | <i>L. braziliensis</i> | 2003              | Peru     | Loreto         | commercial kit    |
| MHOM/PE/01/LH2162(PER002) | PER002A1    | <i>L. braziliensis</i> | 2001              | Peru     | Madre de Dios  | commercial kit    |
| MHOM/PE/02/LH2330(PER069) | PER069A1    | <i>L. braziliensis</i> | 2002              | Peru     | Madre de Dios  | commercial kit    |
| MHOM/PE/91/LC1412         | LC1412C3    | <i>L. braziliensis</i> | 1991              | Peru     | Huánuco        | phenol/chloroform |
| MHOM/PE/03/PER260         | PER260A1    | <i>L. braziliensis</i> | 2003              | Peru     | Madre de Dios  | commercial kit    |
| MHOM/BO/94/CUM29          | CUM29A1     | <i>L. braziliensis</i> | 1994              | Bolivia  | Parque Isiboro | commercial kit    |
| MHOM/PE/02/LH2332(PER086) | PER086A1    | <i>L. braziliensis</i> | 2002              | Peru     | Pasco          | commercial kit    |
| MHOM/BR/2015/RO393        | RO393A1     | <i>L. braziliensis</i> | 2015              | Brazil   | Rondônia       | commercial kit    |
| MHOM/PE/90/LH825          | LH825B2     | <i>L. braziliensis</i> | 1990              | Peru     | Ucayali        | commercial kit    |
| MHOM/PE/03/PER215         | PER215A1    | <i>L. braziliensis</i> | 2003              | Peru     | Ucayali        | commercial kit    |
| MHOM/CO/83/REST417        | REST417A1   | <i>L. panamensis</i>   | 1983              | Colombia | -              | phenol/chloroform |
| MCAN/PE/95/HR434          | HR434C3     | hybrid                 | 1995              | Peru     | Huánuco        | phenol/chloroform |
| MCAN/PE/95/HR410          | HR410A1     | hybrid                 | 1995              | Peru     | Huánuco        | commercial kit    |
| MCAN/PE/95/HR434          | HR434A1     | hybrid                 | 1995              | Peru     | Huánuco        | commercial kit    |
| MCAN/PE/95/HR80           | HR80A1      | hybrid                 | 1995              | Peru     | Huánuco        | commercial kit    |
| MHOM/PE/91/LC1407         | LC1407A1    | hybrid                 | 1991              | Peru     | Huánuco        | commercial kit    |
| MHOM/PE/91/LC1408         | LC1408A1    | hybrid                 | 1991              | Peru     | Huánuco        | commercial kit    |
| MHOM/PE/91/LC1418         | LC1418A1    | hybrid                 | 1991              | Peru     | Huánuco        | commercial kit    |
| MHOM/PE/91/LC1419         | LC1419A1    | hybrid                 | 1991              | Peru     | Huánuco        | commercial kit    |
| MHOM/PE/94/LC2435         | LC2435A1    | hybrid                 | 1994              | Peru     | Huánuco        | commercial kit    |
| MHOM/PE/94/LC2520         | LC2520A1    | hybrid                 | 1994              | Peru     | Huánuco        | commercial kit    |



|                           |            |                     |  |      |      |          |                   |
|---------------------------|------------|---------------------|--|------|------|----------|-------------------|
| MHOM/PE/95/LC2851         | LC2851A1   | hybrid              |  | 1995 | Peru | Huánuco  | commercial kit    |
| MHOM/PE/95/LC2877         | LC2877A1   | hybrid              |  | 1995 | Peru | Huánuco  | commercial kit    |
| MHOM/PE/91/LH1099         | LH1099A1   | hybrid              |  | 1991 | Peru | Huánuco  | commercial kit    |
| MHOM/PE/02/LH2215(PER011) | PER011A1   | hybrid              |  | 2002 | Peru | Huánuco  | commercial kit    |
| MHOM/PE/03/LH2439(PER126) | LH2439A1   | <i>L. peruviana</i> |  | 2003 | Peru | -        | commercial kit    |
| MHOM/PE/84/LC26cl6        | LC26cl6A1  | <i>L. peruviana</i> |  | 1984 | Peru | Ancash   | commercial kit    |
| MHOM/PE/88/LC272          | LC272A1    | <i>L. peruviana</i> |  | 1988 | Peru | Ancash   | commercial kit    |
| MHOM/PE/90/LC436          | LC436A1    | <i>L. peruviana</i> |  | 1990 | Peru | Ancash   | commercial kit    |
| MHOM/PE/90/LC443          | LC443A1    | <i>L. peruviana</i> |  | 1990 | Peru | Ancash   | commercial kit    |
| MHOM/PE/90/LC468          | LC468A1    | <i>L. peruviana</i> |  | 1990 | Peru | Ancash   | commercial kit    |
| MHOM/PE/89/LH741          | LH741A1    | <i>L. peruviana</i> |  | 1989 | Peru | Ancash   | commercial kit    |
| IAYA/PE/90/La36           | La36A1     | <i>L. peruviana</i> |  | 1990 | Peru | Ayacucho | commercial kit    |
| MHOM/PE/90/LCA04          | LCA04A1    | <i>L. peruviana</i> |  | 1990 | Peru | Ayacucho | commercial kit    |
| MHOM/PE/90/LCA08          | LCA08A1    | <i>L. peruviana</i> |  | 1990 | Peru | Ayacucho | commercial kit    |
| MHOM/PE/90/LCA09          | LCA09A1    | <i>L. peruviana</i> |  | 1990 | Peru | Ayacucho | commercial kit    |
| MHOM/PE/01/LH2161(PER001) | LH2161A1   | <i>L. peruviana</i> |  | 2001 | Peru | Ayacucho | commercial kit    |
| MHOM/PE/90/LH249          | LH249A1    | <i>L. peruviana</i> |  | 1990 | Peru | Ayacucho | commercial kit    |
| MCAN/PE/95/HR78           | HR78C3     | <i>L. peruviana</i> |  | 1995 | Peru | Quera    | phenol/chloroform |
| MCAN/PE/95/HR78           | HR78A1     | <i>L. peruviana</i> |  | 1995 | Peru | Huánuco  | commercial kit    |
| MHOM/PE/94/LC2434         | LC2434A1   | <i>L. peruviana</i> |  | 1994 | Peru | Huánuco  | commercial kit    |
| MCAN/PE/76/D8(LV608)      | D8A1       | <i>L. peruviana</i> |  | 1976 | Peru | Lima     | commercial kit    |
| MHOM/PE/91/LC1015         | LC1015A1   | <i>L. peruviana</i> |  | 1991 | Peru | Lima     | commercial kit    |
| MHOM/PE/90/LCA04          | LCA04B2    | <i>L. peruviana</i> |  | 1990 | Peru | Ayacucho | phenol/chloroform |
| MHOM/PE/85/LC106cl6       | LC106cl6A1 | <i>L. peruviana</i> |  | 1985 | Peru | Lima     | commercial kit    |
| MHOM/PE/02/LH2355(PER087) | LH2355A1   | <i>L. peruviana</i> |  | 2002 | Peru | Lima     | commercial kit    |
| MHOM/PE/89/LH696          | LH696A1    | <i>L. peruviana</i> |  | 1989 | Peru | Lima     | commercial kit    |
| MHOM/PE/90/LH827          | LH827A1    | <i>L. peruviana</i> |  | 1990 | Peru | Lima     | commercial kit    |
| MHOM/PE/90/LH925          | LH925A1    | <i>L. peruviana</i> |  | 1990 | Peru | Lima     | commercial kit    |
| MHOM/PE/90/HB22           | HB22A1     | <i>L. peruviana</i> |  | 1990 | Peru | Piura    | commercial kit    |
| MHOM/PE/90/HB31           | HB31A1     | <i>L. peruviana</i> |  | 1990 | Peru | Piura    | commercial kit    |
| MHOM/PE/90/HB44           | HB44A1     | <i>L. peruviana</i> |  | 1990 | Peru | Piura    | commercial kit    |
| MHOM/PE/90/HB55           | HB55A1     | <i>L. peruviana</i> |  | 1990 | Peru | Piura    | commercial kit    |
| MHOM/PE/90/HB56           | HB56A1     | <i>L. peruviana</i> |  | 1990 | Peru | Piura    | commercial kit    |
| MHOM/PE/90/HB67           | HB67A1     | <i>L. peruviana</i> |  | 1990 | Peru | Piura    | commercial kit    |
| MHOM/PE/90/HB83           | HB83A1     | <i>L. peruviana</i> |  | 1990 | Peru | Piura    | commercial kit    |
| MHOM/PE/90/HB86           | HB86A1     | <i>L. peruviana</i> |  | 1990 | Peru | Piura    | commercial kit    |
| MHOM/PE/89/LC900          | LC900A1    | <i>L. peruviana</i> |  | 1989 | Peru | Piura    | commercial kit    |

**Table S2. Deleterious mutations.**Deleterious SNPs and INDELS that were fixed in *L. peruviana* and absent in *L. braziliensis*. All INDELS occurred in hypothetical proteins

| TYPE OF MUTATION | CHROMOSOME    | POSITION | REF ALLELE | ALT ALLELE | EFFECT      | PRODUCT                                             | ORTHOLOGOUS GROUP | GENE ID      |
|------------------|---------------|----------|------------|------------|-------------|-----------------------------------------------------|-------------------|--------------|
| <b>SNP</b>       | LbrM_17_v4_49 | 664535   | C          | T          | stop gained | ion transport protein, putative                     | ORTHOMCL5645      | LbrM.17.1590 |
| <b>SNP</b>       | LbrM_20_v4_69 | 395387   | T          | C          | start lost  | translation elongation factor 1-beta (eEF1B beta 2) | NA                | NA           |
| <b>DELETION</b>  | LbrM_23_v4_56 | 278811   | TG         | T          | frameshift  | hypothetical                                        | ORTHOMCL6525      | LbrM.11.0220 |
| <b>SNP</b>       | LbrM_23_v4_56 | 257291   | A          | G          | start lost  | kinesin-C                                           | ORTHOMCL4417      | LbrM.23.0710 |
| <b>INSERTION</b> | LbrM_25_v4_58 | 515739   | T          | TCA        | frameshift  | hypothetical                                        | ORTHOMCL3965      | LbrM.25.1270 |
| <b>INSERTION</b> | LbrM_28_v4_62 | 1109098  | G          | GC         | frameshift  | hypothetical                                        | ORTHOMCL3110      | LbrM.28.2900 |
| <b>SNP</b>       | LbrM_34_v4_67 | 1231005  | A          | G          | start lost  | class I transcription factor A, subunit 2, putative | ORTHOMCL1229      | LbrM.34.3060 |
| <b>DELETION</b>  | LbrM_35_v4_68 | 842557   | GTC        | G          | frameshift  | hypothetical                                        | NA                | NA           |
| <b>SNP</b>       | LbrM_35_v4_68 | 915726   | C          | T          | stop gained | hypothetical                                        | ORTHOMCL817       | LbrM.35.2530 |

**Table S3.  $F_{IS}$ .**

$F_{IS}$  as estimated per polymorphic SNP site in three groups of parasites representing the three major *Leishmania* populations in Peru.

| Population                                    | <i>L. braziliensis</i> | <i>L. peruviana</i> Porculla | <i>L. peruviana</i> Surco |
|-----------------------------------------------|------------------------|------------------------------|---------------------------|
| Country                                       | Peru                   | Peru                         | Peru                      |
| Region                                        | Huánuco                | Piura                        | Ayacucho                  |
| Year                                          | 1991-1995              | 1989-1990                    | 1990                      |
| N isolates                                    | 6                      | 4                            | 5                         |
| N polymorphic sites                           | 162,204                | 1,877                        | 1,426                     |
| Proportion of loci with $-0.1 > F_{IS} < 0.1$ | 40%                    | 3,56%                        | 0%                        |
| Proportion of loci with $F_{IS} < -0.1$       | 44%                    | 90%                          | 93%                       |
| Proportion of loci with $F_{IS} = -1$         | 2,38%                  | 42%                          | 48%                       |
| Fis median                                    | -0,09                  | -0,6                         | -0,67                     |
| Fis mean                                      | -0,11                  | -0,54                        | -0,54                     |

**Table S4. SNP differences between hybrid isolates.**

Number of SNPs differing at one (below diagonal) or both (above diagonal) alleles. Hybrids from the Nolder et al. (2009) are indicated by their respective zymodeme between brackets (LON2018-221)

| Column1           | LC2877A1<br>(LON221) | HR410A1<br>(LON219) | HR434A1<br>(LON218) | LC2435A1<br>(LON220) | HR80A1<br>(LON218) | LC2520A1 | LC1407A1 | LC1408A1 | LC1418A1 | LC1419A1 | LH1099A1 | LC2851A1 | PER011A1 |
|-------------------|----------------------|---------------------|---------------------|----------------------|--------------------|----------|----------|----------|----------|----------|----------|----------|----------|
| LC2877A1 (LON221) |                      | 0                   | 0                   | 0                    | 1                  | 4        | 1        | 1        | 2        | 0        | 0        | 2        | 3        |
| HR410A1 (LON219)  | 1036                 |                     | 0                   | 1                    | 0                  | 12       | 1        | 0        | 1        | 0        | 0        | 0        | 0        |
| HR434A1 (LON218)  | 1042                 | 322                 |                     | 1                    | 0                  | 12       | 1        | 0        | 1        | 0        | 0        | 2        | 0        |
| LC2435A1 (LON220) | 884                  | 662                 | 668                 |                      | 0                  | 3        | 1        | 0        | 1        | 0        | 0        | 1        | 0        |
| HR80A1 (LON218)   | 1255                 | 825                 | 841                 | 1053                 |                    | 3        | 1        | 0        | 2        | 0        | 0        | 4        | 0        |
| LC2520A1          | 3928                 | 4088                | 4106                | 3962                 | 4391               |          | 5        | 4        | 6        | 3        | 3        | 4        | 167      |
| LC1407A1          | 1316                 | 888                 | 906                 | 1144                 | 569                | 4462     |          | 1        | 2        | 1        | 1        | 1        | 1        |
| LC1408A1          | 1235                 | 875                 | 923                 | 1061                 | 1036               | 4381     | 869      |          | 2        | 0        | 0        | 1        | 2        |
| LC1418A1          | 1598                 | 1110                | 1144                | 1356                 | 1103               | 4698     | 946      | 1217     |          | 1        | 1        | 2        | 1        |
| LC1419A1          | 1264                 | 834                 | 874                 | 1084                 | 527                | 4422     | 326      | 835      | 916      |          | 0        | 0        | 0        |
| LH1099A1          | 1255                 | 767                 | 803                 | 1029                 | 790                | 4359     | 615      | 884      | 825      | 557      |          | 0        | 0        |
| LC2851A1          | 3578                 | 3792                | 3784                | 3656                 | 4007               | 6426     | 4110     | 4025     | 4368     | 4070     | 4051     |          | 0        |
| PER011A1          | 6293                 | 5851                | 5857                | 6111                 | 6042               | 9103     | 5919     | 5976     | 6125     | 5867     | 5792     | 9111     |          |

**Table S5: Mapping statistics as outputted by the KOMICS pipeline**

| Isolate       | Median genome-wide read depth | Number of reads | Number of mapped reads | Proportion of mapped reads | Number of reads w/ MQ>20 | Proportion of mapped reads w/ MQ>20 | Number of proper pairs | Proportion of mapped proper pairs | Number of CSB3 reads | Number of mapped CSB3 reads | Proportion of mapped CSB3 reads | Number of perfectly matched CSB3 reads | Proportion of perfectly matched CSB3 reads | Number of proper paired CSB3 reads | Proportion of properly paired CSB3 reads | Number of minicircle sequence classes |
|---------------|-------------------------------|-----------------|------------------------|----------------------------|--------------------------|-------------------------------------|------------------------|-----------------------------------|----------------------|-----------------------------|---------------------------------|----------------------------------------|--------------------------------------------|------------------------------------|------------------------------------------|---------------------------------------|
| <b>MEAN</b>   | <b>1938903</b>                | -               | <b>80%</b>             | -                          | <b>93%</b>               | -                                   | <b>95%</b>             | -                                 | -                    | <b>95%</b>                  | -                               | <b>89%</b>                             | -                                          | <b>90%</b>                         | -                                        |                                       |
| <b>MEDIAN</b> | <b>1704236</b>                | -               | <b>81%</b>             | -                          | <b>93%</b>               | -                                   | <b>95%</b>             | -                                 | -                    | <b>95%</b>                  | -                               | <b>91%</b>                             | -                                          | <b>91%</b>                         | -                                        |                                       |
| <b>MIN</b>    | <b>437178</b>                 | -               | <b>36%</b>             | -                          | <b>89%</b>               | -                                   | <b>91%</b>             | -                                 | -                    | <b>91%</b>                  | -                               | <b>81%</b>                             | -                                          | <b>83%</b>                         | -                                        |                                       |
| <b>MAX</b>    | <b>6022478</b>                | -               | <b>94%</b>             | -                          | <b>95%</b>               | -                                   | <b>97%</b>             | -                                 | -                    | <b>98%</b>                  | -                               | <b>96%</b>                             | -                                          | <b>95%</b>                         | -                                        |                                       |
| CUM29A1       | 63                            | 2563732         | 2249534                | 88%                        | 2075048                  | 92%                                 | 2151222                | 96%                               | 236609               | 222890                      | 94%                             | 208320                                 | 88%                                        | 213562                             | 90%                                      | 274                                   |
| D8A1          | 64                            | 856842          | 703178                 | 82%                        | 647624                   | 92%                                 | 662316                 | 94%                               | 80883                | 77885                       | 96%                             | 73829                                  | 91%                                        | 74201                              | 92%                                      | 87                                    |
| HB22A1        | 87                            | 3821476         | 3369185                | 88%                        | 3133343                  | 93%                                 | 3229178                | 96%                               | 427851               | 410095                      | 96%                             | 393514                                 | 92%                                        | 395799                             | 93%                                      | 109                                   |
| HB31A1        | 69                            | 4160628         | 3632897                | 87%                        | 3323128                  | 91%                                 | 3442252                | 95%                               | 476648               | 448164                      | 94%                             | 422812                                 | 89%                                        | 428076                             | 90%                                      | 111                                   |
| HB44A1        | 99                            | 4210622         | 3602197                | 86%                        | 3330085                  | 92%                                 | 3425858                | 95%                               | 465971               | 442432                      | 95%                             | 423098                                 | 91%                                        | 417804                             | 90%                                      | 111                                   |
| HB55A1        | 89                            | 1486450         | 1176572                | 79%                        | 1083480                  | 92%                                 | 1117762                | 95%                               | 152011               | 145561                      | 96%                             | 140548                                 | 92%                                        | 139356                             | 92%                                      | 107                                   |
| HB56A1        | 81                            | 3110238         | 2752880                | 89%                        | 2554937                  | 93%                                 | 2641650                | 96%                               | 339739               | 327589                      | 96%                             | 312080                                 | 92%                                        | 315044                             | 93%                                      | 110                                   |
| HB67A1        | 61                            | 4427034         | 1587847                | 36%                        | 1464123                  | 92%                                 | 1523672                | 96%                               | 188816               | 181984                      | 96%                             | 173117                                 | 92%                                        | 174866                             | 93%                                      | 111                                   |
| HB83A1        | 77                            | 3415300         | 3017341                | 88%                        | 2805209                  | 93%                                 | 2870352                | 95%                               | 364649               | 345222                      | 95%                             | 329588                                 | 90%                                        | 332356                             | 91%                                      | 109                                   |
| HB86A1        | 80                            | 1877216         | 1562713                | 83%                        | 1439785                  | 92%                                 | 1487988                | 95%                               | 194191               | 181877                      | 94%                             | 172605                                 | 89%                                        | 173945                             | 90%                                      | 101                                   |

|            |     |         |         |     |         |     |         |     |        |        |     |        |     |        |     |     |
|------------|-----|---------|---------|-----|---------|-----|---------|-----|--------|--------|-----|--------|-----|--------|-----|-----|
| HR410A1    | 55  | 505250  | 343951  | 68% | 321899  | 94% | 315576  | 92% | 68370  | 62068  | 91% | 56256  | 82% | 57726  | 84% | 123 |
| HR434A1    | 60  | 609148  | 458471  | 75% | 437281  | 95% | 435640  | 95% | 83980  | 78668  | 94% | 72129  | 86% | 75318  | 90% | 112 |
| HR78A1     | 59  | 437178  | 275903  | 63% | 262137  | 95% | 257710  | 93% | 48974  | 45396  | 93% | 41579  | 85% | 42662  | 87% | 104 |
| HR80A1     | 53  | 765524  | 604022  | 79% | 566868  | 94% | 560856  | 93% | 122025 | 113173 | 93% | 103156 | 85% | 106493 | 87% | 133 |
| La36A1     | 87  | 972144  | 784008  | 81% | 723533  | 92% | 741524  | 95% | 97859  | 93823  | 96% | 89897  | 92% | 90082  | 92% | 85  |
| LC1015A1   | 62  | 784688  | 634434  | 81% | 592461  | 93% | 607436  | 96% | 79594  | 76060  | 96% | 72634  | 91% | 73000  | 92% | 78  |
| LC106cl6A1 | 88  | 2652184 | 2384321 | 90% | 2209944 | 93% | 2255728 | 95% | 307178 | 293576 | 96% | 281537 | 92% | 283220 | 92% | 88  |
| LC1407A1   | 76  | 637664  | 430846  | 68% | 389924  | 91% | 399328  | 93% | 59160  | 54446  | 92% | 51323  | 87% | 49257  | 83% | 132 |
| LC1408A1   | 87  | 1389504 | 1133765 | 82% | 1037637 | 92% | 1080672 | 95% | 145306 | 138621 | 95% | 131482 | 90% | 132467 | 91% | 150 |
| LC1418A1   | 87  | 1042116 | 818559  | 79% | 748063  | 91% | 771514  | 94% | 107806 | 103301 | 96% | 98702  | 92% | 97749  | 91% | 148 |
| LC1419A1   | 105 | 1390264 | 1116626 | 80% | 1021255 | 91% | 1057354 | 95% | 147463 | 141159 | 96% | 134893 | 91% | 134836 | 91% | 138 |
| LC2421A1   | 62  | 817308  | 621914  | 76% | 579007  | 93% | 572132  | 92% | 119664 | 111040 | 93% | 100744 | 84% | 102459 | 86% | 176 |
| LC2434A1   | 50  | 459972  | 322401  | 70% | 304542  | 94% | 300432  | 93% | 63615  | 59030  | 93% | 53576  | 84% | 55037  | 87% | 90  |
| LC2435A1   | 72  | 489270  | 264253  | 54% | 249994  | 95% | 245250  | 93% | 50960  | 46813  | 92% | 42845  | 84% | 43978  | 86% | 123 |
| LC2452A1   | 58  | 670500  | 405465  | 60% | 380528  | 94% | 373244  | 92% | 81474  | 74038  | 91% | 66332  | 81% | 69264  | 85% | 174 |
| LC2520A1   | 65  | 527630  | 335432  | 64% | 317116  | 95% | 315510  | 94% | 61813  | 57405  | 93% | 52539  | 85% | 54344  | 88% | 114 |
| LC2551A1   | 59  | 870492  | 648749  | 75% | 612130  | 94% | 600398  | 93% | 130842 | 120029 | 92% | 107144 | 82% | 112544 | 86% | 108 |
| LC26cl6A1  | 82  | 835740  | 698582  | 84% | 652667  | 93% | 676538  | 97% | 87046  | 85314  | 98% | 82106  | 94% | 82846  | 95% | 99  |
| LC272A1    | 94  | 2547878 | 2266474 | 89% | 2117227 | 93% | 2188840 | 97% | 287367 | 276602 | 96% | 263646 | 92% | 268773 | 94% | 100 |
| LC2851A1   | 53  | 479088  | 333703  | 70% | 316633  | 95% | 307554  | 92% | 64979  | 60087  | 92% | 55083  | 85% | 55763  | 86% | 117 |
| LC2873A1   | 63  | 742998  | 544601  | 73% | 506953  | 93% | 497002  | 91% | 110518 | 100649 | 91% | 89391  | 81% | 93009  | 84% | 251 |
| LC2877A1   | 50  | 703758  | 547038  | 78% | 513484  | 94% | 508914  | 93% | 111153 | 102061 | 92% | 92313  | 83% | 96321  | 87% | 106 |
| LC436A1    | 123 | 2027388 | 1632141 | 81% | 1508194 | 92% | 1542344 | 94% | 203986 | 198548 | 97% | 188811 | 93% | 185061 | 91% | 103 |
| LC443A1    | 80  | 2020436 | 1701260 | 84% | 1568366 | 92% | 1605280 | 94% | 230426 | 218803 | 95% | 209185 | 91% | 203902 | 88% | 99  |
| LC468A1    | 93  | 1835794 | 1624660 | 88% | 1505595 | 93% | 1562226 | 96% | 207732 | 200047 | 96% | 190272 | 92% | 193685 | 93% | 106 |
| LC900A1    | 89  | 3353872 | 3022193 | 90% | 2786692 | 92% | 2874660 | 95% | 358752 | 343569 | 96% | 329472 | 92% | 331039 | 92% | 110 |
| LCA04A1    | 91  | 2211264 | 1975696 | 89% | 1839578 | 93% | 1883632 | 95% | 241437 | 233534 | 97% | 221397 | 92% | 225952 | 94% | 88  |

|          |     |         |         |     |         |     |         |     |        |        |     |        |     |        |     |     |
|----------|-----|---------|---------|-----|---------|-----|---------|-----|--------|--------|-----|--------|-----|--------|-----|-----|
| LCA08A1  | 94  | 531410  | 399713  | 75% | 372246  | 93% | 383864  | 96% | 50276  | 48816  | 97% | 46497  | 92% | 47252  | 94% | 85  |
| LCA09A1  | 100 | 750612  | 592146  | 79% | 555424  | 94% | 570646  | 96% | 72186  | 70241  | 97% | 67437  | 93% | 67900  | 94% | 84  |
| LH1099A1 | 89  | 774338  | 557781  | 72% | 505573  | 91% | 523360  | 94% | 77308  | 73924  | 96% | 70982  | 92% | 69621  | 90% | 130 |
| LH2161A1 | 94  | 2060770 | 1631760 | 79% | 1512947 | 93% | 1548654 | 95% | 207682 | 195460 | 94% | 182858 | 88% | 185322 | 89% | 87  |
| LH2355A1 | 110 | 1565798 | 1215102 | 78% | 1135240 | 93% | 1168720 | 96% | 151139 | 147228 | 97% | 142834 | 95% | 141614 | 94% | 92  |
| LH2439A1 | 87  | 961024  | 809411  | 84% | 755121  | 93% | 771252  | 95% | 105302 | 99516  | 95% | 92737  | 88% | 96146  | 91% | 85  |
| LH249A1  | 79  | 1235982 | 1037959 | 84% | 971023  | 94% | 994734  | 96% | 125723 | 122267 | 97% | 116304 | 93% | 118051 | 94% | 80  |
| LH696A1  | 85  | 1704236 | 1502320 | 88% | 1400521 | 93% | 1424218 | 95% | 174990 | 169270 | 97% | 162718 | 93% | 162827 | 93% | 89  |
| LH741A1  | 73  | 2062296 | 1843172 | 89% | 1717217 | 93% | 1781062 | 97% | 223733 | 214198 | 96% | 203306 | 91% | 206322 | 92% | 81  |
| LH825B2  | 56  | 480114  | 324564  | 68% | 302314  | 93% | 300340  | 93% | 64473  | 59097  | 92% | 52734  | 82% | 55312  | 86% | 293 |
| LH827A1  | 82  | 2085308 | 1874883 | 90% | 1753588 | 94% | 1809228 | 96% | 237857 | 231093 | 97% | 219899 | 92% | 224262 | 94% | 103 |
| LH925A1  | 73  | 1773630 | 1524147 | 86% | 1415896 | 93% | 1419932 | 93% | 179503 | 169877 | 95% | 163464 | 91% | 159192 | 89% | 81  |
| PER002A1 | 59  | 2794564 | 2068061 | 74% | 1838627 | 89% | 1937296 | 94% | 293638 | 271941 | 93% | 243261 | 83% | 246800 | 84% | 318 |
| PER005A1 | 50  | 1857180 | 1486084 | 80% | 1376300 | 93% | 1427564 | 96% | 176911 | 170968 | 97% | 160581 | 91% | 163085 | 92% | 213 |
| PER010A1 | 70  | 1203276 | 969626  | 81% | 878669  | 91% | 916082  | 94% | 120775 | 113962 | 94% | 104299 | 86% | 106106 | 88% | 333 |
| PER011A1 | 53  | 4611804 | 4260033 | 92% | 3982221 | 93% | 4104410 | 96% | 473537 | 463141 | 98% | 442094 | 93% | 445026 | 94% | 233 |
| PER012A1 | 57  | 4015010 | 3567576 | 89% | 3251468 | 91% | 3400194 | 95% | 424394 | 400597 | 94% | 369337 | 87% | 376795 | 89% | 303 |
| PER014A1 | 68  | 2791912 | 2553819 | 91% | 2374264 | 93% | 2448794 | 96% | 282118 | 267541 | 95% | 253824 | 90% | 257068 | 91% | 155 |
| PER065A1 | 62  | 4872468 | 4234412 | 87% | 3897910 | 92% | 4004884 | 95% | 519873 | 487354 | 94% | 451079 | 87% | 443694 | 85% | 188 |
| PER069A1 | 62  | 2470734 | 2228883 | 90% | 2048915 | 92% | 2169834 | 97% | 245228 | 236180 | 96% | 223440 | 91% | 231091 | 94% | 123 |
| PER086A1 | 62  | 4431772 | 2625497 | 59% | 2417373 | 92% | 2504756 | 95% | 312722 | 298344 | 95% | 280767 | 90% | 283858 | 91% | 208 |
| PER094A1 | 86  | 6022478 | 4793749 | 80% | 4394258 | 92% | 4621366 | 96% | 567178 | 538391 | 95% | 495673 | 87% | 517226 | 91% | 246 |
| PER201A1 | 58  | 2146594 | 1986552 | 93% | 1846268 | 93% | 1927370 | 97% | 228326 | 220160 | 96% | 208002 | 91% | 210853 | 92% | 184 |
| PER215A1 | 60  | 2744252 | 2573124 | 94% | 2423950 | 94% | 2481362 | 96% | 292068 | 287177 | 98% | 280185 | 96% | 274126 | 94% | 114 |
| PER260A1 | 60  | 3634752 | 3351627 | 92% | 3137123 | 94% | 3259404 | 97% | 372656 | 361263 | 97% | 346747 | 93% | 352173 | 95% | 145 |
| RO393A1  | 50  | 859962  | 598855  | 70% | 571336  | 95% | 569962  | 95% | 108602 | 101921 | 94% | 93609  | 86% | 97702  | 90% | 138 |

**Table S6: Predicted maxicircle-encoded guide RNA genes.**

Predicted maxicircle-encoded guide RNA genes for isolate HR78 (*L. peruviana* Porculla), LCA04 (*L. peruviana* SUCS), LC1412 (*L. braziliensis*) and HR434 (hybrid). Note that for isolate LCA04 there is no annotation after position 17,206 due to an incomplete maxicircle assembly. Orange bars show guide RNA genes also found in *L. tarentolae*. Yellow bars indicate guide RNA genes unique to *L. braziliensis*.

| strain | start on maxi | end on maxi | strand   | gene  | start on gene | end on gene | strain | start on maxi | end on maxi | strand   | gene  | start on gene | end on gene |
|--------|---------------|-------------|----------|-------|---------------|-------------|--------|---------------|-------------|----------|-------|---------------|-------------|
| HR78   | 234           | 281         | template | ND9   | 563           | 610         | LCA04  | 133           | 180         | template | ND9   | 563           | 610         |
| HR78   | 363           | 410         | coding   | ND9   | 205           | 252         | LCA04  | 262           | 309         | coding   | ND9   | 205           | 252         |
| HR78   | 405           | 453         | template | GR3   | 142           | 190         | LCA04  | 304           | 352         | template | GR3   | 142           | 190         |
|        |               |             |          |       |               |             | LCA04  | 344           | 384         | template | A6    | 135           | 175         |
| HR78   | 557           | 600         | coding   | ND9   | 90            | 133         | LCA04  | 456           | 499         | coding   | ND9   | 90            | 133         |
| HR78   | 689           | 737         | template | ND7   | 17            | 65          | LCA04  | 588           | 636         | template | ND7   | 17            | 65          |
| HR78   | 1577          | 1623        | coding   | GR4   | 24            | 70          | LCA04  | 1476          | 1522        | coding   | GR4   | 24            | 70          |
| HR78   | 2595          | 2645        | template | CYb   | 21            | 71          | LCA04  | 2489          | 2539        | template | CYb   | 21            | 71          |
| HR78   | 8444          | 8495        | coding   | ND9   | 304           | 355         | LCA04  | 8336          | 8387        | coding   | ND9   | 304           | 355         |
| HR78   | 8590          | 8643        | coding   | GR4   | 251           | 304         | LCA04  | 8482          | 8535        | coding   | GR4   | 251           | 304         |
| HR78   | 10790         | 10836       | template | GR3   | 66            | 112         | LCA04  | 10682         | 10728       | template | GR3   | 66            | 112         |
| HR78   | 11117         | 11158       | template | GR4   | 81            | 122         | LCA04  | 11009         | 11050       | template | GR4   | 81            | 122         |
| HR78   | 11117         | 11158       | template | ND8   | 1             | 42          | LCA04  | 11009         | 11050       | template | ND8   | 1             | 42          |
| HR78   | 11128         | 11169       | template | GR4   | 248           | 289         | LCA04  | 11020         | 11061       | template | GR4   | 248           | 289         |
| HR78   | 11586         | 11628       | coding   | GR3   | 97            | 139         | LCA04  | 11478         | 11520       | coding   | GR3   | 97            | 139         |
| HR78   | 13452         | 13509       | coding   | MURF2 | 26            | 83          | LCA04  | 13344         | 13401       | coding   | MURF2 | 26            | 83          |
| HR78   | 17077         | 17123       | template | CYb   | 48            | 94          | LCA04  | 16969         | 17015       | template | CYb   | 48            | 94          |
| HR78   | 17213         | 17259       | coding   | GR4   | 399           | 445         | LCA04  | 17105         | 17151       | coding   | GR4   | 399           | 445         |
| HR78   | 17314         | 17359       | template | A6    | 114           | 159         | LCA04  | 17206         | 17251       | template | A6    | 112           | 157         |
| HR78   | 18651         | 18695       | coding   | ND8   | 381           | 425         |        |               |             |          |       |               |             |
| HR78   | 18671         | 18715       | coding   | GR3   | 94            | 138         |        |               |             |          |       |               |             |
| HR78   | 18674         | 18717       | coding   | ND9   | 322           | 365         |        |               |             |          |       |               |             |



**Table S6 continued**

| strain | start on maxi | end on maxi | strand   | gene  | start on gene | end on gene | strain | start on maxi | end on maxi | strand   | gene  | start on gene | end on gene |
|--------|---------------|-------------|----------|-------|---------------|-------------|--------|---------------|-------------|----------|-------|---------------|-------------|
| LC1412 | 1246          | 1293        | coding   | ND9   | 205           | 252         | HR434  | 1246          | 1293        | coding   | ND9   | 205           | 252         |
| LC1412 | 1288          | 1336        | template | GR3   | 142           | 190         | HR434  | 1288          | 1336        | template | GR3   | 142           | 190         |
| LC1412 | 1439          | 1482        | coding   | ND9   | 90            | 133         | HR434  | 1439          | 1482        | coding   | ND9   | 90            | 133         |
| LC1412 | 1571          | 1619        | template | ND7   | 17            | 65          | HR434  | 1571          | 1619        | template | ND7   | 17            | 65          |
| LC1412 | 2459          | 2505        | coding   | GR4   | 24            | 70          | HR434  | 2459          | 2505        | coding   | GR4   | 24            | 70          |
| LC1412 | 3532          | 3582        | template | CYb   | 21            | 71          | HR434  | 3532          | 3582        | template | CYb   | 21            | 71          |
| LC1412 | 9368          | 9419        | coding   | ND9   | 304           | 355         | HR434  | 9368          | 9419        | coding   | ND9   | 304           | 355         |
| LC1412 | 9514          | 9567        | coding   | GR4   | 251           | 304         | HR434  | 9514          | 9567        | coding   | GR4   | 251           | 304         |
| LC1412 | 11714         | 11760       | template | GR3   | 66            | 112         | HR434  | 11714         | 11760       | template | GR3   | 66            | 112         |
| LC1412 | 12041         | 12082       | template | GR4   | 81            | 122         | HR434  | 12041         | 12082       | template | GR4   | 81            | 122         |
| LC1412 | 12041         | 12082       | template | ND8   | 38            | 79          | HR434  | 12041         | 12082       | template | ND8   | 38            | 79          |
| LC1412 | 12052         | 12093       | template | GR4   | 248           | 289         | HR434  | 12052         | 12093       | template | GR4   | 248           | 289         |
| LC1412 | 12510         | 12552       | coding   | GR3   | 97            | 139         | HR434  | 12510         | 12552       | coding   | GR3   | 97            | 139         |
| LC1412 | 14376         | 14433       | coding   | MURF2 | 26            | 83          | HR434  | 14376         | 14433       | coding   | MURF2 | 26            | 83          |
| LC1412 | 18001         | 18047       | template | CYb   | 48            | 94          | HR434  | 18001         | 18047       | template | CYb   | 48            | 94          |
| LC1412 | 18137         | 18183       | coding   | GR4   | 399           | 445         | HR434  | 18137         | 18183       | coding   | GR4   | 399           | 445         |
| LC1412 | 18231         | 18271       | template | A6    | 117           | 157         | HR434  | 18231         | 18271       | template | A6    | 117           | 157         |
| LC1412 | 19636         | 19680       | coding   | GR4   | 254           | 298         | HR434  | 19636         | 19680       | coding   | GR4   | 254           | 298         |
| LC1412 | 19670         | 19711       | coding   | GR3   | 153           | 194         | HR434  | 19670         | 19711       | coding   | GR3   | 153           | 194         |

**Table S7: Predicted minicircle-encoded guide RNA genes**

Results from prediction of guide RNA genes within four isolates, representing the three major *Leishmania* populations in Peru and a hybrid *L. braziliensis* x *L. peruviana* isolate.

| Isolate                                                                                                 | LCA04               | HR78                | HR434  | LC1412                 |
|---------------------------------------------------------------------------------------------------------|---------------------|---------------------|--------|------------------------|
| Species                                                                                                 | <i>L. peruviana</i> | <i>L. peruviana</i> | Hybrid | <i>L. braziliensis</i> |
| Population                                                                                              | SUCS                | PORCULLA            | -      | -                      |
| Number of minicircles                                                                                   | 80                  | 106                 | 141    | 117                    |
| Number of annotated minicircles                                                                         | 65                  | 83                  | 91     | 93                     |
| Percentage of annotated minicircles                                                                     | 81%                 | 78%                 | 65%    | 79%                    |
| Number of predicted guide RNA genes in minicircles                                                      | 104                 | 130                 | 138    | 135                    |
| Number of predicted guide RNA genes in maxicircle                                                       | 19                  | 21                  | 19     | 19                     |
| Total number of gRNAs                                                                                   | 123                 | 151                 | 157    | 154                    |
| <b>Number of guide RNA genes per maxicircle gene (maxicircle-encoded gRNA's are given in brackets):</b> |                     |                     |        |                        |
| A6 (5' edited)                                                                                          | 5 (2)               | 7 (1)               | 7 (1)  | 6 (1)                  |
| COIII (5' edited)                                                                                       | 2                   | 1                   | 2      | 2                      |
| CYb (5' edited)                                                                                         | 0 (2)               | 1 (2)               | 1 (2)  | 0 (2)                  |
| GR3 (pan edited)                                                                                        | 4 (3)               | 5 (4)               | 5 (4)  | 6 (4)                  |
| GR4 (pan edited)                                                                                        | 25 (5)              | 29 (5)              | 32 (6) | 31 (6)                 |
| ND3 (pan edited)                                                                                        | 18                  | 24                  | 25     | 20                     |
| ND7 (5' edited)                                                                                         | 2 (1)               | 1 (1)               | 3 (1)  | 1 (1)                  |
| ND8 (pan edited)                                                                                        | 14 (1)              | 19 (2)              | 20 (1) | 24 (1)                 |
| ND9 (pan edited)                                                                                        | 20 (4)              | 29 (5)              | 30 (3) | 31 (3)                 |
| RPS12 (pan edited)                                                                                      | 14                  | 14                  | 13     | 14                     |
| COII (internally edited)                                                                                | 0                   | 0                   | 0      | 0                      |
| MURF2 (5' edited)                                                                                       | 0 (1)               | 0 (1)               | 0 (1)  | 0 (1)                  |
| <b>Coverage statistics:</b>                                                                             |                     |                     |        |                        |
| initiator gRNAs                                                                                         | 7                   | 9                   | 9      | 10                     |
| gRNAs with mismatches                                                                                   | 109                 | 133                 | 138    | 131                    |
| missing gRNAs                                                                                           | 16                  | 10                  | 12     | 9                      |
| insertions                                                                                              | 1589                | 1583                | 1588   | 1588                   |
| insertions covered                                                                                      | 1483                | 1537                | 1543   | 1556                   |
| insertions not covered                                                                                  | 106                 | 46                  | 45     | 32                     |
| deletions                                                                                               | 162                 | 162                 | 160    | 160                    |
| deletions covered                                                                                       | 137                 | 158                 | 159    | 160                    |
| deletions not covered                                                                                   | 25                  | 4                   | 1      | 0                      |
| Percentage covered                                                                                      | 92,52%              | 97,13%              | 97,37% | 98,17%                 |

**Table S8: List of studies providing time estimates for the divergence between *L. major* and *L. infantum***

| Study                 | Group | Time (my) | Genetic dataset                   | Assumptions used for node calibration         | Reference |
|-----------------------|-------|-----------|-----------------------------------|-----------------------------------------------|-----------|
| Lukes et al. (2014)   | A     | 12        | alignment of 42 proteins          | fossil calibration                            | (11)      |
| Barratt et al. (2017) | A     | 16        | concatenated 18s rDNA and RPOIILS | Split Australia and South-America (36-41 mya) | (12)      |
| Lukes et al. (2007)   | A     | 14,6      | GAPDH                             | Gondwana separation hypothesis (100 mya)      | (13)      |
|                       | B     | 24,7      | RPOII                             | Gondwana separation hypothesis (100 mya)      |           |
| Harkins et al. (2016) | B     | 24,2      | WGS gene alignments               | Gondwana separation hypothesis (100 mya)      | (14)      |
|                       | B     | 21,1      | WGS gene alignments               | Split Australia and South-America (40 mya)    |           |
| Kaufer et al. (2019a) | B     | 20,3      | maxicircle alignments             | Gondwana separation hypothesis (100 mya)      | (15)      |
| Kaufer et al. (2019b) | B     | 25        | maxicircle alignments             | Split Australia and South-America (40 mya)    | (16)      |

my = million years

## SI References

1. A. M. Bolger, M. Lohse, B. Usadel, Trimmomatic: A flexible trimmer for Illumina sequence data. *Bioinformatics* (2014) <https://doi.org/10.1093/bioinformatics/btu170>.
2. D. Li, C. M. Liu, R. Luo, K. Sadakane, T. W. Lam, MEGAHIT: An ultra-fast single-node solution for large and complex metagenomics assembly via succinct de Bruijn graph. *Bioinformatics* (2015) <https://doi.org/10.1093/bioinformatics/btv033>.
3. D. S. Ray, Conserved sequence blocks in kinetoplast minicircles from diverse species of trypanosomes. *Mol. Cell. Biol.* **9**, 1365–1367 (1989).
4. S. F. Altschul, W. Gish, W. Miller, E. W. Myers, D. J. Lipman, Basic local alignment search tool. *J. Mol. Biol.* **215**, 403–410 (1990).
5. L. Simpson, S. M. Douglass, J. A. Lake, M. Pellegrini, F. Li, Comparison of the mitochondrial genomes and steady state transcriptomes of two strains of the trypanosomatid parasite, leishmania tarentolae. *PLoS Negl. Trop. Dis.* **9**, e0003841 (2015).
6. P. Sloof, *et al.*, The nucleotide sequence of the variable region in Trypanosoma brucei completes the sequence analysis of the maxicircle component of mitochondrial kinetoplast DNA. *Mol. Biochem. Parasitol.* (1992) [https://doi.org/10.1016/0166-6851\(92\)90178-M](https://doi.org/10.1016/0166-6851(92)90178-M).
7. B. Blum, N. Bakalara, L. Simpson, A model for RNA editing in kinetoplastid mitochondria: RNA molecules transcribed from maxicircle DNA provide the edited information. *Cell* **60**, 189–98 (1990).
8. H. van der Spek, *et al.*, Conserved genes encode guide RNAs in mitochondria of Crithidia fasciculata. *EMBO J.* **10**, 1217–24 (1991).
9. P. R. Gent, *et al.*, The community climate system model version 4. *J. Clim.* (2011) <https://doi.org/10.1175/2011JCLI4083.1>.
10. S. Watanabe, *et al.*, MIROC-ESM 2010: Model description and basic results of CMIP5-20c3m experiments. *Geosci. Model Dev.* (2011) <https://doi.org/10.5194/gmd-4-845-2011>.
11. J. Lukeš, T. Skalický, J. Týč, J. Votýpka, V. Yurchenko, Evolution of parasitism in kinetoplastid flagellates. *Mol. Biochem. Parasitol.* **195**, 115–122 (2014).
12. J. Barratt, *et al.*, Isolation of Novel Trypanosomatid, Zelonina australiensis sp. nov. (Kinetoplastida: Trypanosomatidae) Provides Support for a Gondwanan Origin of Dixerous Parasitism in the Leishmaniinae. *PLoS Negl. Trop. Dis.* **11**, e0005215 (2017).
13. J. Lukes, *et al.*, Evolutionary and geographical history of the Leishmania donovani complex with a revision of current taxonomy. *Proc. Natl. Acad. Sci. U. S. A.* **104**, 9375–9380 (2007).
14. K. M. Harkins, R. S. Schwartz, R. A. Cartwright, A. C. Stone, Phylogenomic reconstruction supports supercontinent origins for Leishmania. *Infect. Genet. Evol.* **38**, 101–109 (2016).
15. A. Kaufer, J. Barratt, D. Stark, J. Ellis, The complete coding region of the maxicircle as a superior phylogenetic marker for exploring evolutionary relationships between members of the Leishmaniinae. *Infect. Genet. Evol.* **70**, 90–100 (2019).
16. A. Kaufer, D. Stark, J. Ellis, Evolutionary Insight into the Trypanosomatidae Using Alignment-Free Phylogenomics of the Kinetoplast. *Pathogens* **8**, 157 (2019).
